# Supplementary material for: Recoverable organorhodium-functionalized polyhedral oligomeric silsesquioxane: a bifunctional heterogeneous catalyst for asymmetric transfer hydrogenation of aromatic ketones in aqueous medium
Source: Royal Society of Chemistry journal article supplement (doi:10.1039/c2cc31927f), 2012-01-01

Supporting Information for

**Recoverable Organorhodium-functionalized Polyhedral Oligomeric  
Silsesquioxane: A Bifunctional Heterogeneous Catalyst for Asymmetric  
Transfer Hydrogenation of Aromatic Ketones in Aqueous Medium**

Shuang Tang, Ronghua Jin, Huaisheng Zhang, Hui Yao, Jinglan Zhuang,  
Guohua Liu\* and Hexing Li\*

Key Laboratory of Resource Chemistry of Ministry of Education, Shanghai Key  
Laboratory of Rare Earth Functional Materials, Shanghai Normal University, Shanghai  
200234, P. R. China

|              | <b>Content</b>                                                                                                                                      | <b>Page</b> |
|--------------|-----------------------------------------------------------------------------------------------------------------------------------------------------|-------------|
| Experimental | General, characterization, preparation and catalytic reaction                                                                                       | S2          |
| Figure S1    | FT-IR, <sup>1</sup> H-NMR, <sup>13</sup> C-NMR and HPLC-MS spectra of <i>R,R</i> -( <b>2</b> )                                                      | S5          |
| Figure S2    | TG/DTA curves of TsDPEN-modified POSS and the catalyst <b>3</b>                                                                                     | S8          |
| Figure S3    | FT-IR spectra of TsDPEN-modified POSS and the catalyst <b>3</b>                                                                                     | S10         |
| Figure S4    | <sup>13</sup> C CP MAS NMR spectra of the catalyst <b>3</b> , TsDPEN-modified POSS, and TsDPEN-modified POSS without the deprotection of Boc groups | S11         |
| Figure S5    | <sup>31</sup> Si CP MAS NMR spectrum of the catalyst <b>3</b>                                                                                       | S13         |
| Table S1     | Asymmetric transfer hydrogenation of aromatic ketones                                                                                               | S14         |
| Figure S6    | Asymmetric transfer hydrogenation of aromatic ketones                                                                                               | S15         |
| Table S2     | Reusability of <b>3</b> using acetophenone as a substrate                                                                                           | S21         |
| Figure S7    | Reusability of <b>3</b> using acetophenone as a substrate                                                                                           | S21         |
| Table S3     | Asymmetric transfer hydrogenation of ketones and analogues.                                                                                         | S27         |
| Table S8     | Asymmetric transfer hydrogenation of ketones and analogues.                                                                                         | S28         |
| Figure S9    | The SEM (a) and TEM (b) images of the catalyst <b>3</b>                                                                                             | S33         |
| Figure 10    | Asymmetric transfer hydrogenation using 10.0 mmol of acetophenone as a substrate                                                                    | S34         |

## Experimental

### 1. General

All experiments, which are sensitive to moisture or air, were carried out under an Ar atmosphere using the standard Schlenk techniques. (*R,R*)-1,2-diphenylenediamine [(*R,R*)-DPEN] and [Cp\**RhCl*<sub>2</sub>]<sub>2</sub> were purchased from Sigma-Aldrich Company Ltd. Compound (*R,R*)-4-(methylphenylsulfonyl)-1,2-bis(4-methoxyphenyl)enediamine and octa((benzylchloride)ethenyl)silsesquioxane POSS-(**1**) was synthesized according to the reported literature. The products of the ATH were analyzed by a GC using a Supelco β-Dex 120 chiral column (30 m×0.25 mm(i.d.), 0.25 μm film) or a HPLC with a UV-Vis detector using a Daicel OJ-H chiralcel columns (Φ 0.46 x 25 cm).

### 2. Characterization

Rh loading amount in the catalyst was analyzed using an inductively coupled plasma optical emission spectrometer (ICP, Varian VISTA-MPX). Fourier transform infrared (FTIR) spectra were collected on a Nicolet Magna 550 spectrometer using KBr method. X-ray powder diffraction (XRD) was carried out on a Rigaku D/Max-RB diffractometer with CuKα radiation. Scanning electron microscopy (SEM) images were obtained using a JEOL JSM-6380LV microscope operating at 20 kV. X-ray photoelectron spectroscopy (XPS) measurements were performed on a Perkin-Elmer PHI 5000C ESCA system. All the binding energies were calibrated by using the contaminant carbon (C<sub>1s</sub> = 284.6 eV) as a reference. Liquid-state <sup>1</sup>H NMR, <sup>13</sup>C NMR, and Solid-state <sup>29</sup>Si MAS NMR and <sup>13</sup>C CP MAS NMR spectra were recorded on a Bruker AV-400 spectrometer. Elemental analysis was performed with a Carlo Erba 1106 Elemental Analyzer.

### 3. Synthesis of (*R,R*)-2:

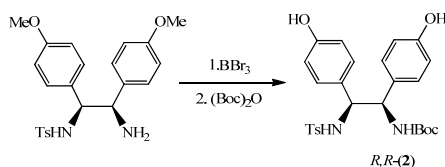

Under argon atmosphere, to a stirred solution of (*1R,2R*)-*N*-*p*-toluenesulfonyl-1,2-di(4-methoxyphenyl)ethylenediamine (0.43g, 1.00 mmol) in 10 mL dry CH<sub>2</sub>Cl<sub>2</sub> was added dropwise BBr<sub>3</sub> (0.21 mL, 2.20 mmol) in 2 mL

dry  $\text{CH}_2\text{Cl}_2$  at  $-78\text{ }^\circ\text{C}$ . The resulting mixture was then allowed to warm to room temperature slowly and stirred for another 12 h. After the solvent was removed *in vacuo*, the residue was suspended in 10 mL  $\text{CH}_3\text{CN}$  again. To this stirred solution was added di-*tert*-butyl dicarbonate (0.13 g, 0.60 mmol) and  $\text{Et}_3\text{N}$  (1.0 mL) at room temperature. The resulting mixture was stirred for another 2 h. After the solvent was removed *in vacuo*, the residue was fast passed through a short column (silica gel, eluent: Hexane/ $\text{EtOAc}$  = 1/1) and concentrated *in vacuo* to afford (*R,R*)-**2** (0.38 g, 0.76 mmol) as a white solid. Yield: 76.3%; mp: 206-207 $^\circ\text{C}$ ;  $[\alpha]_{\text{D}}^{20} = +100.6$  (c 0.20, methanol); IR (KBr)  $\text{cm}^{-1}$ : 3380.0 (w), 3288.4 (m), 3069.6 (s), 3039.3 (s), 2999.9 (s), 2974.0 (s), 2928.5 (s), 1689.5 (w), 1610.2 (s), 1514.5 (w), 1454.1 (s), 1406.9 (s), 1365.8 (s), 1308.0 (s), 1280.6 (s), 1248.4 (m), 1227.8 (s), 1169.0 (m), 1148.1 (w), 1094.7 (s), 1061.7 (s), 1017.2 (s), 942.2 (s), 816.1 (s), 780.1 (s), 731.5 (s), 704.1 (s), 672.8 (s), 606.4 (s), 566.7 (s), 536.8 (s); Elemental analysis (%): C 42.9, H 13.6, N 0.30;  $^1\text{H}$  NMR (400 MHz, DMSO):  $\delta$  9.07, 9.14 (s, 2H, OH), 7.95-7.92 (d,  $J = 9.6$  Hz, 1H, NH), 7.21-7.19 (d,  $J = 8.0$  Hz, 2H), 7.13-7.10 (d,  $J = 9.6$  Hz, 1H, NH), 7.03-7.01 (d,  $J = 8.0$  Hz, 2H), 6.89-6.87 (d,  $J = 8.0$  Hz, 2H), 6.79-6.77 (d,  $J = 8.0$  Hz, 2H), 6.49-6.47 (d,  $J = 8.0$  Hz, 2H), 6.39-6.37 (d,  $J = 8.0$  Hz, 2H), 4.63-4.59 (m,  $J = 8.0$  Hz, 1H), 4.43-4.39 (m,  $J = 8.0$  Hz, 1H), 2.27 (s, 3H), 1.29 (s, 9H);  $^{13}\text{C}$  NMR (400 MHz,  $\text{CDCl}_3$ ):  $\delta$  21.7, 28.9, 59.4, 62.7, 78.4, 114.7, 115.0, 126.9, 128.8, 129.5, 130.4, 131.8, 139.3, 142.2, 155.6, 156.6; Anal. calcd for  $\text{C}_{26}\text{H}_{30}\text{N}_2\text{O}_6\text{S}$  (%): C 62.63, H 6.06, N 5.62, S 6.43. Found: C 62.72, H 6.05, N 5.82, S 6.39; HPLC-MS  $m/z$ :  $[\text{M}^+]$  498.20 (25.6%),  $[\text{M}-1^+]$  497.20 (86.2%), 423.1 (100%), 326.1 (11.2%), 209.1 (26.0%), 155.0 (12.1%). The FT-IR,  $^1\text{H}$ -NMR,  $^{13}\text{C}$ -NMR and HPLC-MS spectra of (*R,R*)-**2** were presented in figure S1.

#### 4. Preparation of *Cp*\*RhTsDPEN-POSS (**3**).

A typical procedure is as follows: Under argon atmosphere, to a stirred suspension of (*R,R*)-**2** (0.50 g, 1.00 mmol) and excess anhydrous  $\text{K}_2\text{CO}_3$  (1.50 g) in 20 mL dry DMF was added POSS (**1**) (0.82 mg, 0.50 mmol) at room temperature. The resulting mixture was stirred at  $40\text{ }^\circ\text{C}$  for 24h. After cooling to room temperature, the volatiles were removed *in vacuo* and 50 mL of water was added. The residues were filtrated and washed twice with 50 mL of water and 50 mL of  $\text{CH}_2\text{Cl}_2$  to afford (*R,R*)-TsDPEN-modified POSS as a white powder (1.06 g, 0.40 mmol, 80%) (The part of them was used for

characterization). The powder (0.5 g) was suspended in 10 mL of CH<sub>2</sub>Cl<sub>2</sub> again and excess trifluoroacetic acid (0.58 mL, 7.5 mmol) was added at room temperature. The resulting mixture was stirred for 48 h at room temperature. After being filtrated, the residues were washed twice with 20 mL of water and 20 mL of CH<sub>2</sub>Cl<sub>2</sub>. The collected white powder was suspended in 10 mL of CH<sub>2</sub>Cl<sub>2</sub> again. To this stirred suspension was added [Cp\**Rh*Cl<sub>2</sub>]<sub>2</sub> (0.15 g, 0.24 mmol) and excess NEt<sub>3</sub> (2.00 mL, 33.08 mmol) at room temperature. The resulting mixture was stirred and refluxed for 12 h. Then the residues were filtrated and washed twice with 20 mL of dry CH<sub>2</sub>Cl<sub>2</sub>. After Soxhlet extraction in dry CH<sub>2</sub>Cl<sub>2</sub> to remove homogeneous and unreacted start materials, the solid was dried under reduced pressure overnight to afford Cp\**Rh*TsDPEN-POSS (**3**) (0.71, 0.18 mmol, 89% relative to TsDPEN-modified POSS) as a light yellow powder. ICP analysis showed that the Rh loading-amount was 77.88 mg (0.76 mmol) per gram catalyst. IR (KBr) cm<sup>-1</sup>: 3398.4(w), 2996.2 (s), 1687.6 (m), 1607.5 (s), 1568.5 (s), 1512.0 (s), 1568.5 (s), 1459.8 (s), 1417.1 (s), 1299.5 (s), 1202.6 (m), 1129.5 (w), 1038.2 (m), 830.7 (m), 720.3 (s), 662.1 (s), 545.8 (s), 464.9 (s); Elemental analysis (%): C 58.59, H 6.19, N 3.89, S 2.42; <sup>29</sup>Si MAS/NMR (300 MHz): T<sup>3</sup> (δ = -71.0 ppm), T<sup>2</sup> (δ = -62.2 ppm); <sup>13</sup>C CP/MAS (161.9 MHz): 7.1-8.3(CH<sub>3</sub>-NEt<sub>3</sub>Cl, and CH<sub>3</sub>-Cp\*), 20.8 (PhCH<sub>3</sub>), 64.2-72.8 (PhCH<sub>2</sub>-O, N-CH), 94.2 (C-Cp), 126.7 (C-Ph), 136.2 (C-Ph) ppm. The FT-IR, <sup>13</sup>C CP MAS NMR, <sup>29</sup>Si CP MAS NMR and TG/DTA curves were presented in figure S2-S5.

### 2.3. Catalytic Reaction

A typical procedure was as follows: The catalyst **3** (10.58 mg, 8.00 μmol based on Rh from ICP), ketone (2.0 mmol) and 2.0 mL water were added in a 10 mL roundbottom flask in turn. The mixture was allowed to react at 40 °C for 1h. During that time, the reaction was monitored constantly by TLC. After completion of the reaction, the catalyst was separated *via* centrifuge (10000r/min) for the recycle experiment. The aqueous solution was extracted by Et<sub>2</sub>O (3 × 3.0 mL). The combined Et<sub>2</sub>O was washed with brine twice and dehydrated with Na<sub>2</sub>SO<sub>4</sub>. After the evaporation of Et<sub>2</sub>O, the residue was purified by silica gel flash column chromatography to afford the desired product. The conversion and the ee value could be determined by chiral GC using a Supelco β-Dex 120 chiral column (30 m × 0.25 mm(i.d.), 0.25 μm film) or a HPLC analysis with a UV-Vis detector using a Daicel OJ-H chiralcel columns (Φ 0.46 x 25 cm)

Figure S1. FT-IR,  $^1\text{H}$ -NMR,  $^{13}\text{C}$ -NMR and HPLC-MS spectra of *(R,R)*-2.

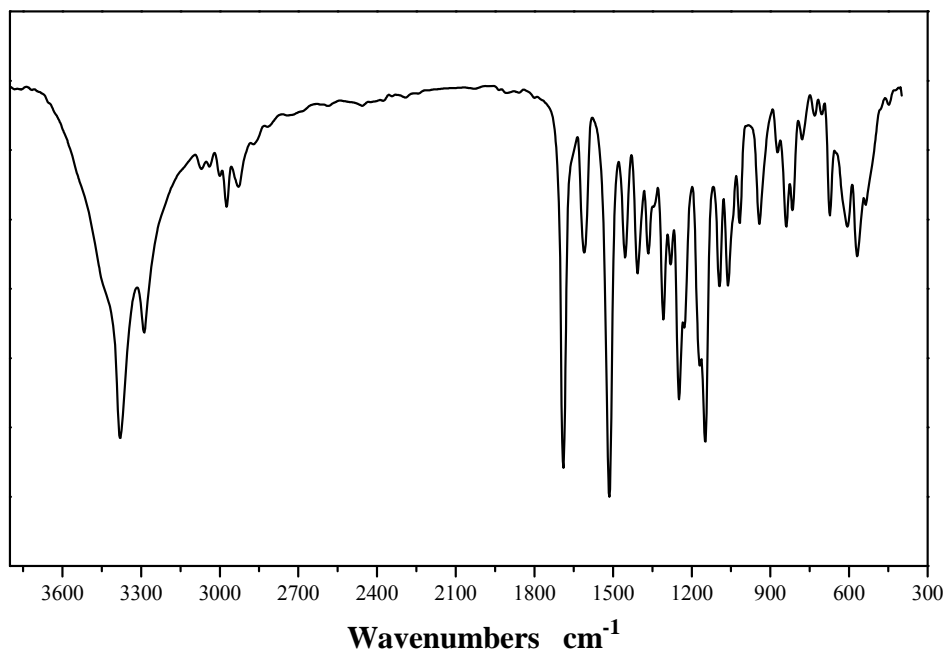

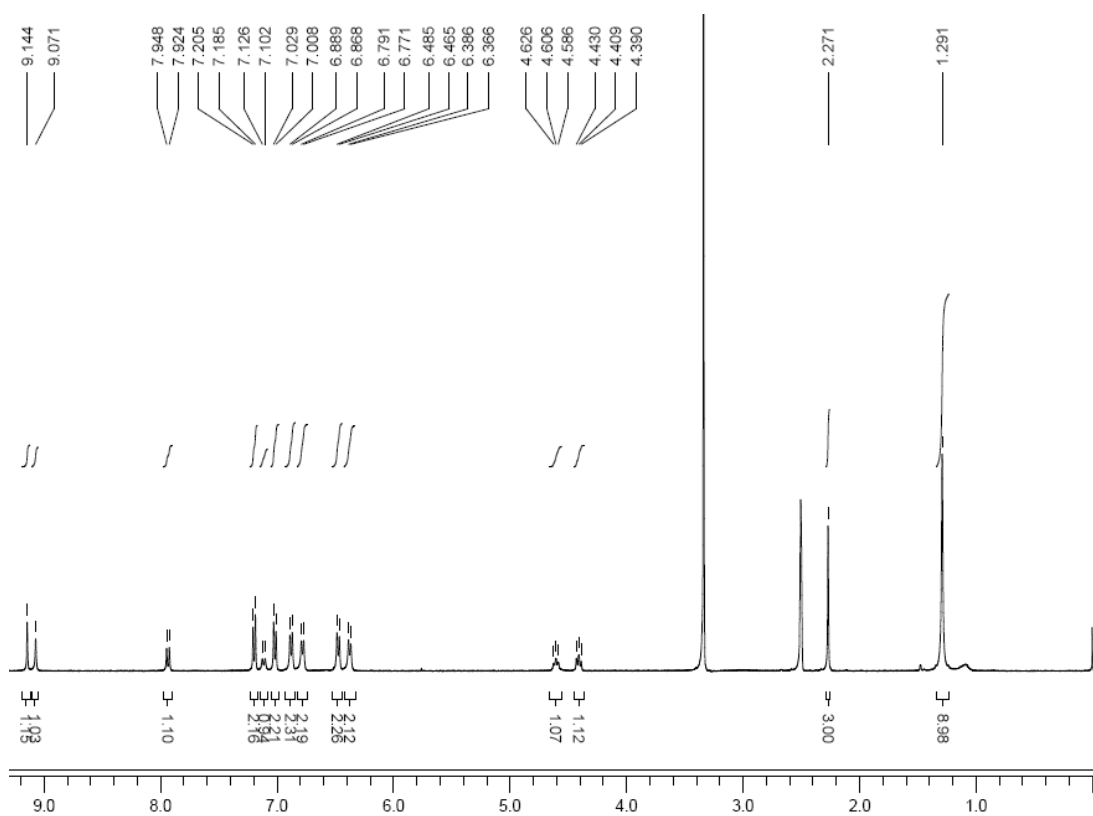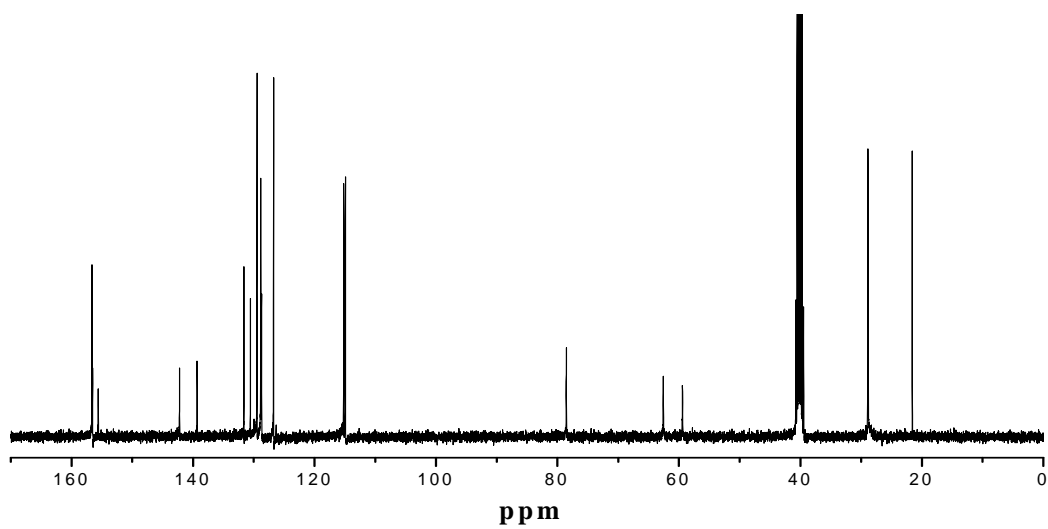

## Qualitative Analysis Report

|                               |                      |                      |                     |
|-------------------------------|----------------------|----------------------|---------------------|
| <b>Data Filename</b>          | scan(neg.)-1.d       | <b>Sample Name</b>   | 1                   |
| <b>Sample Type</b>            | Sample               | <b>Position</b>      | Vial 81             |
| <b>Instrument Name</b>        | Instrument 1         | <b>User Name</b>     |                     |
| <b>Acq Method</b>             |                      | <b>Acquired Time</b> | 2012-01-11 10:57:50 |
| <b>IRM Calibration Status</b> | Not Applicable       | <b>DA Method</b>     | 1.m                 |
| <b>Comment</b>                |                      |                      |                     |
| <b>Data Filename</b>          | pro-(neg-497.2.)-1.d | <b>Sample Name</b>   | 1                   |
| <b>Sample Type</b>            | Sample               | <b>Position</b>      | Vial 81             |
| <b>Instrument Name</b>        | Instrument 1         | <b>User Name</b>     |                     |
| <b>Acq Method</b>             |                      | <b>Acquired Time</b> | 2012-01-11 11:30:13 |
| <b>IRM Calibration Status</b> | Not Applicable       | <b>DA Method</b>     | 1.m                 |
| <b>Comment</b>                |                      |                      |                     |

### User Chromatograms

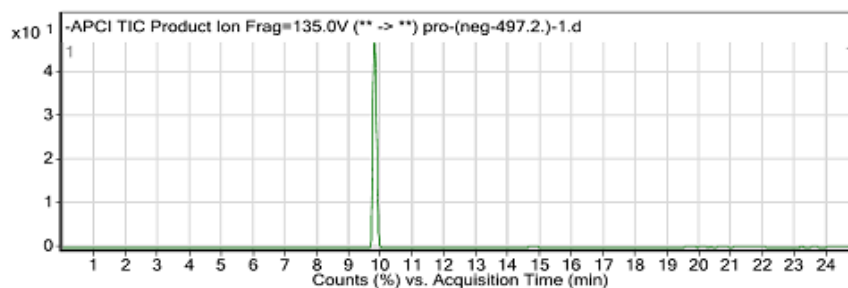

### User Spectra

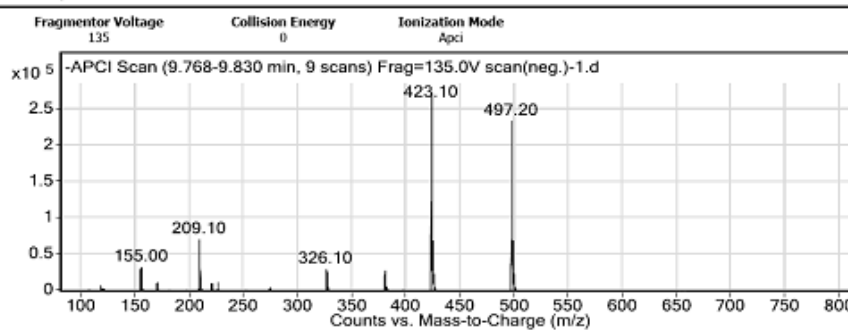

### Peak List

| m/z   | z | Abund  |
|-------|---|--------|
| 155   |   | 33042  |
| 209.1 | 1 | 70826  |
| 326.1 |   | 29983  |
| 423.1 | 1 | 272081 |
| 424.1 | 1 | 69852  |
| 497.2 | 1 | 234529 |
| 498.2 | 1 | 69627  |

**Figure S2.** TG/DTA curves of TsDPEN-modified POSS and the catalyst **3**.

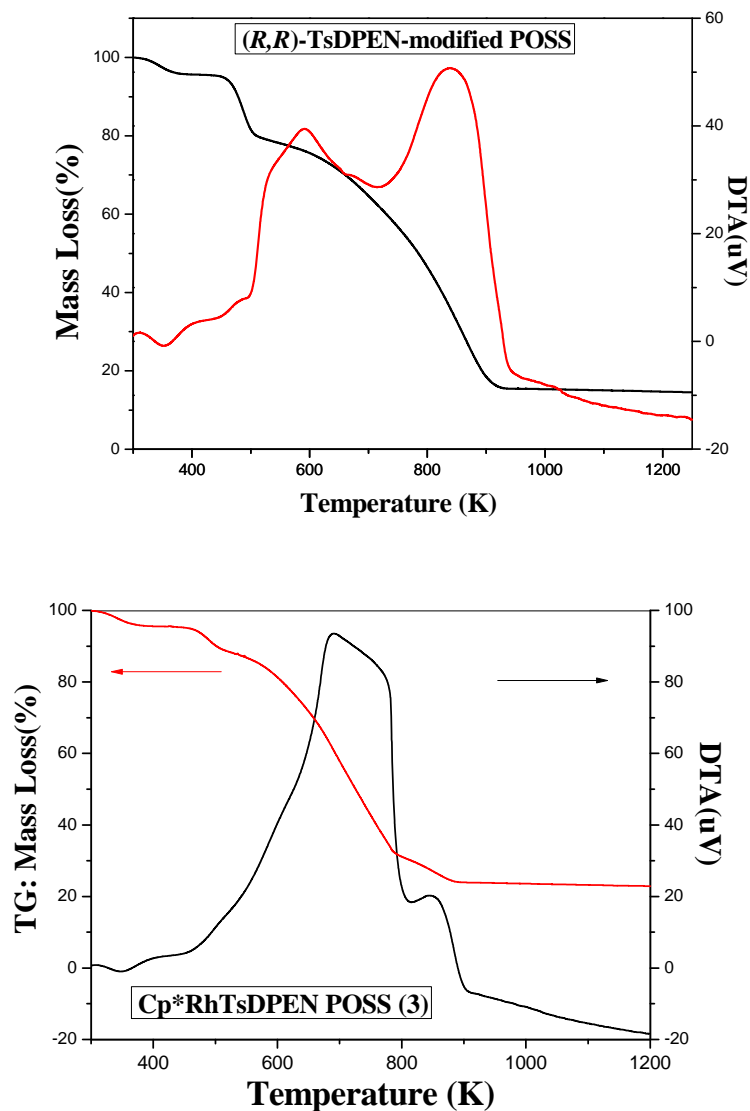

**Explanation:** The TG/DTA curve of TsDPEN-modified POSS was treated in the air as shown in Figure S5. An endothermic peak around 361K with weight loss of 5% could be attributed to the release of physical adsorption water while the another endothermic peak around 452K with weight loss of 14% could be assigned to the release of physical adsorption small moiety silsesquioxane (**1**) due to sublimation (H. Araki and K. Naka, *Macromolecules*, 2011, **44**, 6039). In addition, an exothermic peak around 590 K with



weight loss of 10% could be assigned to the oxidation of vinyl and alkyl fragments while another exothermic peak at 840 K with the weight loss of 54% was resulted from the oxidation of the chiral diamine ligands and phenyl fragments within POSS.

In sharp contrast to TG/DTA curve of TsDPEN-modified POSS, it was found easily that both endothermic peaks in the heterogeneous catalyst **3** were strongly similar to that of parent TsDPEN-modified POSS. It was worth mentioning that two exothermic peaks were combined into one complicated exothermic peak around 688 K with weight loss of 56% could be assigned to the oxidation of Cp\*RhTsDPEN complexes and organic fragments (including small vinyl, alkyl and phenyl fragments). Apparently, a new exothermic peak around 850 K with weight loss of 8% could be assigned to the oxidation of rhodium chloride, which was nearly consistent with 7.79% (0.76 mmol) of Rh loading per gram catalyst detected by inductively coupled plasma (ICP) optical emission spectrometer analysis.

**Figure S3.** FT-IR spectra of TsDPEN-modified POSS and the catalyst **3**.

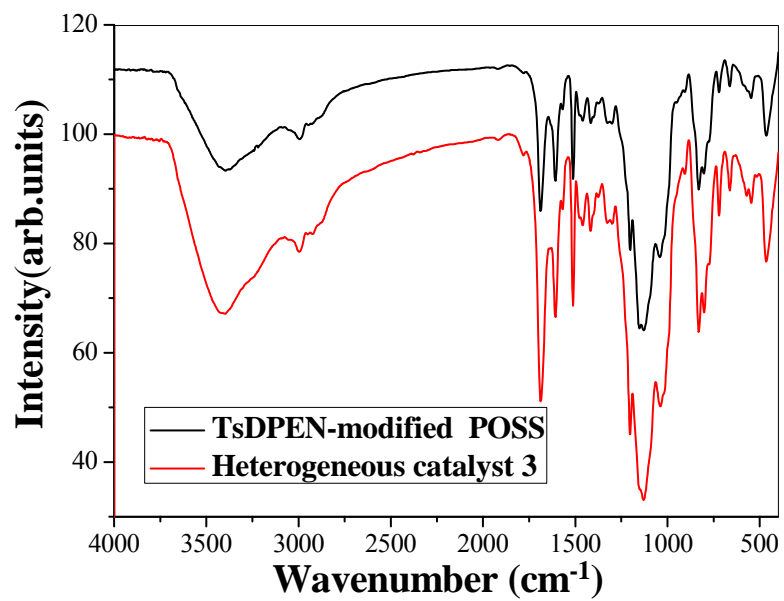

**Figure S4.**  $^{13}\text{C}$  CP MAS NMR spectra of the catalyst **3**, TsDPEN-modified POSS, and TsDPEN-modified POSS without the deprotection of Boc groups.

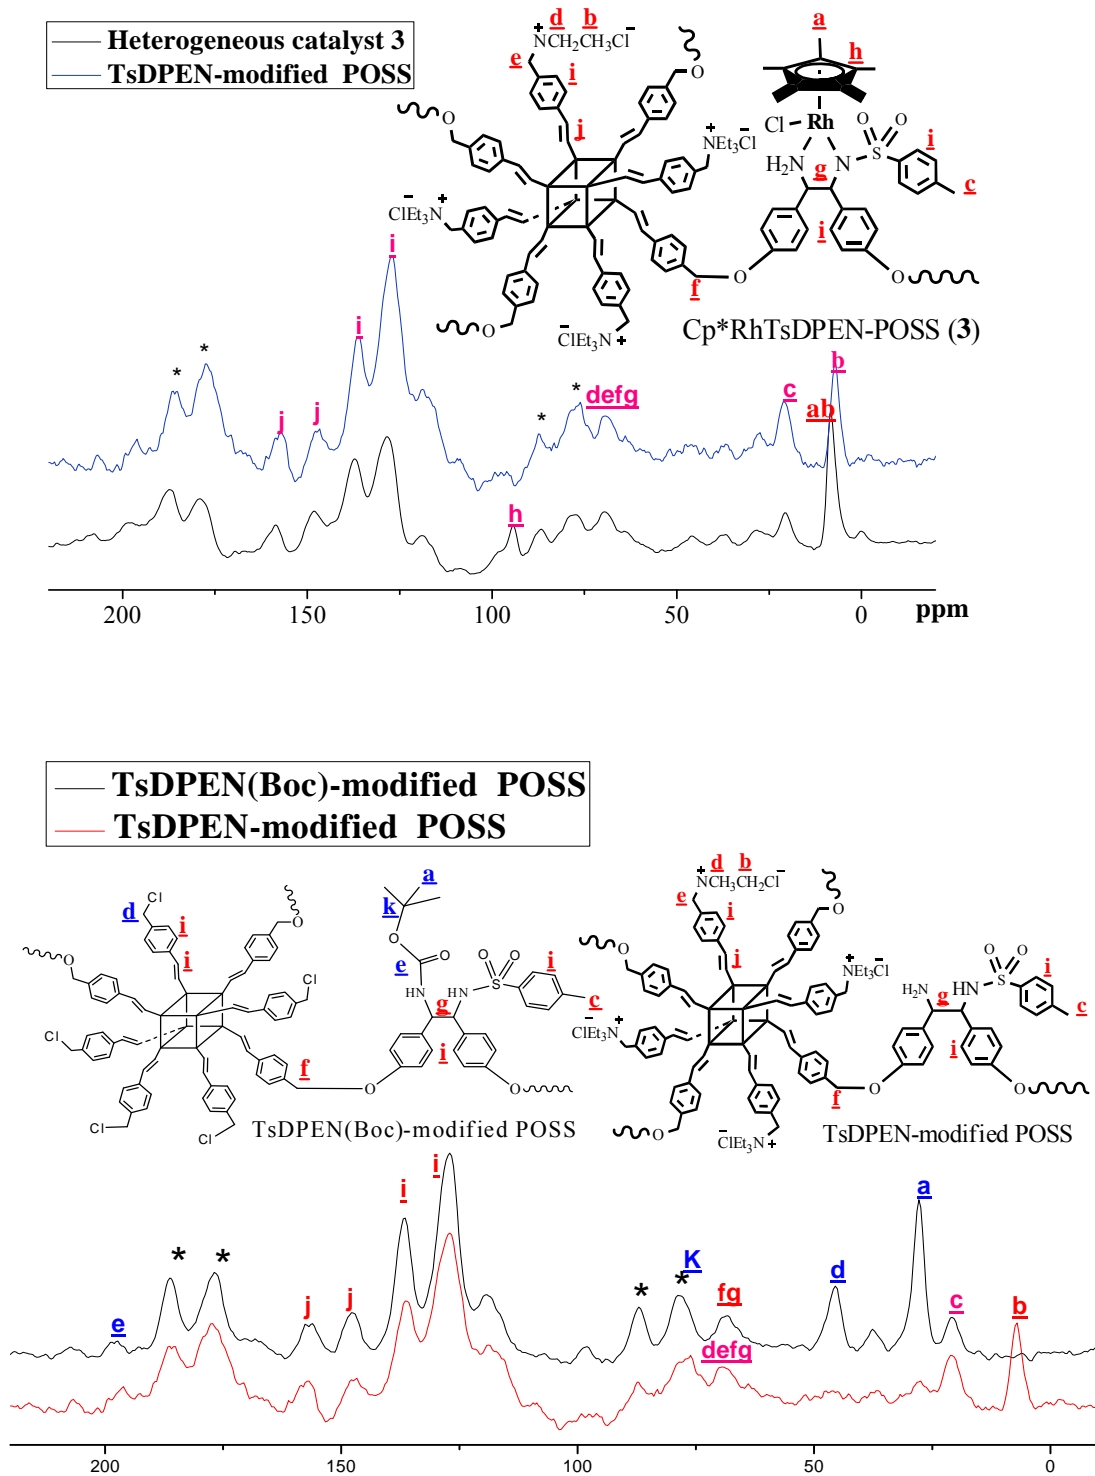

**Explanation:** From the  $^{13}\text{C}$  CP MAS NMR in Fig.S3, the typical peaks of TsDPEN moieties [21 ppm for Ar-CH<sub>2</sub> and 126-136 ppm for C<sub>6</sub>H<sub>5</sub>] and the typical peaks of CpMe<sub>5</sub> moieties (94 ppm for C<sub>5</sub> and 8 ppm CpCH<sub>3</sub>) could be observed clearly. These structural arrangements were strongly similar to those of Cp\*RhTsDPEN, proving the complexation between ligand and [Cp\*RhCl<sub>2</sub>]<sub>2</sub>.

In particular, when compared (*R,R*)-TsDPEN-modified POSS to the that (*R,R*)-TsDPEN-modified POSS without the deprotection of Boc groups, it was found the peak around 27.6 indicative of the C atoms of Boc groups (CH<sub>3</sub>-Boc) disappeared, confirming the deprotection of Boc groups. In addition, the peak of the quaternary carbon (k) on -Boc group should appear in ca. 80 ppm, however, it was difficult to distinguish because of the overlap of the rotational sideband denoted by asterisk. More importantly, the peak around 46 ppm indicative of the C atoms in benzyl chloride (PhCH<sub>2</sub>Cl) groups disappeared that appeared in more low field (64-72 ppm) due to the deshielding effect of quaternary ammonium salt, suggesting the formation of quaternary ammonium salt. All these observations demonstrated that the heterogeneous catalyst **3** was prepared steadily, possessing the same single-site well-defined active centers as the homogeneous Cp\*RhTsDPEN.

**Figure S5.**  $^{31}\text{Si}$  CP MAS NMR spectrum of the catalyst **3**.

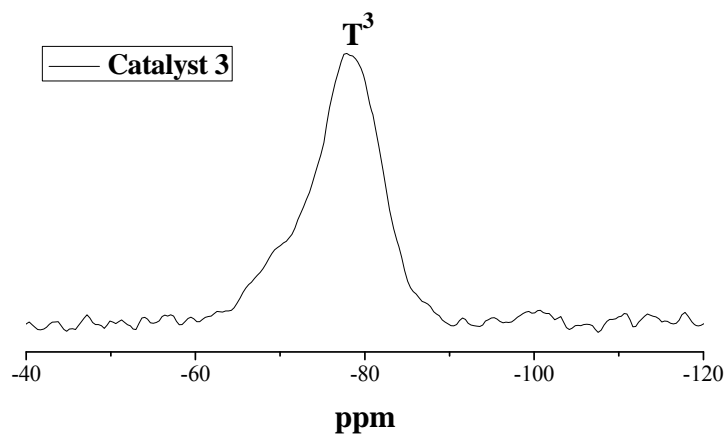

**Table S1.** Asymmetric transfer hydrogenation of aromatic ketones.<sup>a</sup>

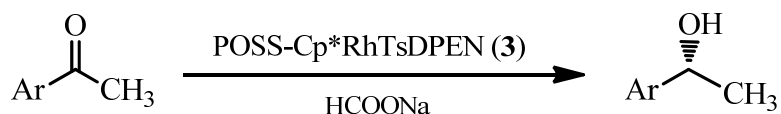

| Entry | Ar        | Conv. (%) <sup>b</sup> | Ee. (%) <sup>b</sup> |
|-------|-----------|------------------------|----------------------|
| 1     | Ph        | >99(88) <sup>c</sup>   | 96(96) <sup>c</sup>  |
| 2     | Ph        | 93                     | 92 <sup>d</sup>      |
| 3     | Ph        | 84                     | 96 <sup>c</sup>      |
| 4     | 4-FPh     | 99                     | 93                   |
| 5     | 4-ClPh    | >99                    | 92                   |
| 6     | 4-BrPh    | >99                    | 92                   |
| 7     | 3-BrPh    | >99                    | 95                   |
| 8     | 4-MePh    | 97                     | 91                   |
| 9     | 4-OMePh   | >99                    | 94                   |
| 10    | 3-OMePh   | >99                    | 93                   |
| 11    | 2-naphthy | >99                    | 92                   |

<sup>a</sup> Reaction conditions: catalysts (10.58 mg, 8.00 μmol of Rh based on ICP analysis), HCO<sub>2</sub>Na (0.68 g, 10.0 mmol), ketone (2.0 mmol) and 2.0 mL water, reaction temperature (40 °C), reaction time (1.0 h).  
<sup>b</sup> Determined by chiral GC or HPLC analysis (see ESI in Fig. S6). <sup>c</sup> Data were obtained using the homogeneous Cp\*RhTsDPEN catalyst. <sup>d</sup> Data were obtained using (*R,R*)-TsDPEN-modified POSS plus [Cp\*RhCl<sub>2</sub>]<sub>2</sub> as a catalyst. <sup>e</sup> Data were obtained using (*R,R*)-TsDPEN-modified POSS plus RhTsDPEN as a catalyst.

**Translation of Chinese to English is as follows:**

| Peak | RetTime [min] | Area     | Area%   | Heigh   | Heigh%  |
|------|---------------|----------|---------|---------|---------|
| 峰号   | 保留时间          | 面积       | 面积%     | 峰高      | 峰高%     |
| 1    | 18.474        | 235619.9 | 92.0500 | 13827.2 | 79.0685 |
| 2    | 19.395        | 9109.7   | 3.5589  | 1042.4  | 5.9606  |

**Figure S6.** Asymmetric transfer hydrogenation of aromatic ketones.

Asymmetric transfer hydrogenation of acetophenone using **3** as a catalyst.

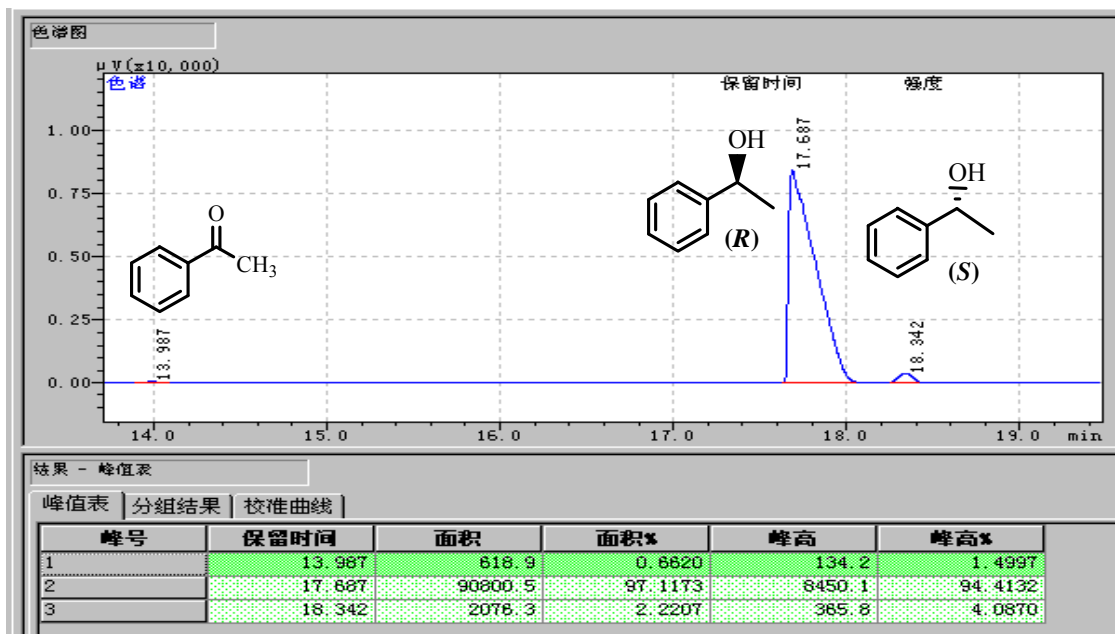

Asymmetric transfer hydrogenation of acetophenone using the homogeneous RhTsDPEN as a catalyst without additive of Bu<sub>4</sub>NBr as a phase transfer catalyst.

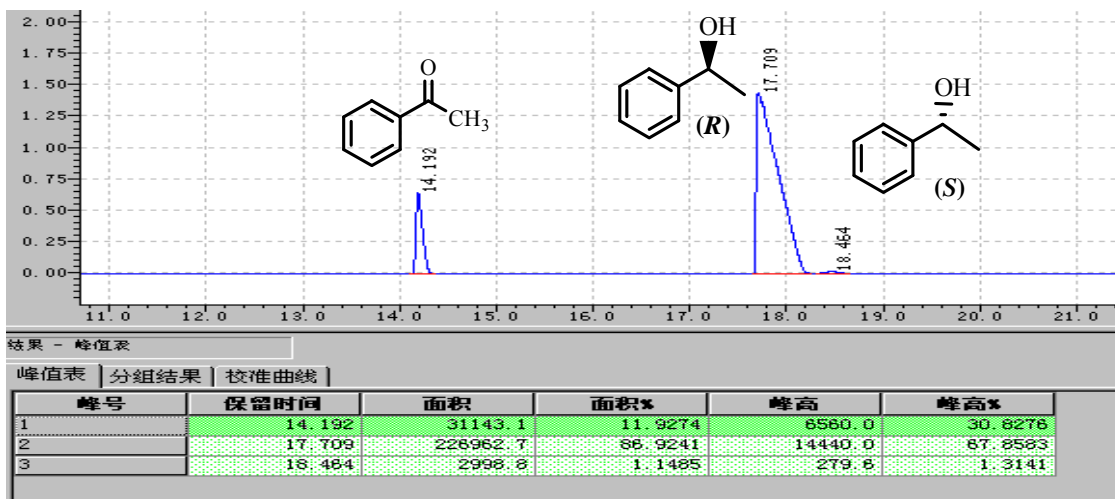

Asymmetric transfer hydrogenation of acetophenone using (*R,R*)-TsDPEN-modified POSS plus [Cp\**Rh*Cl<sub>2</sub>]<sub>2</sub> as a catalyst.

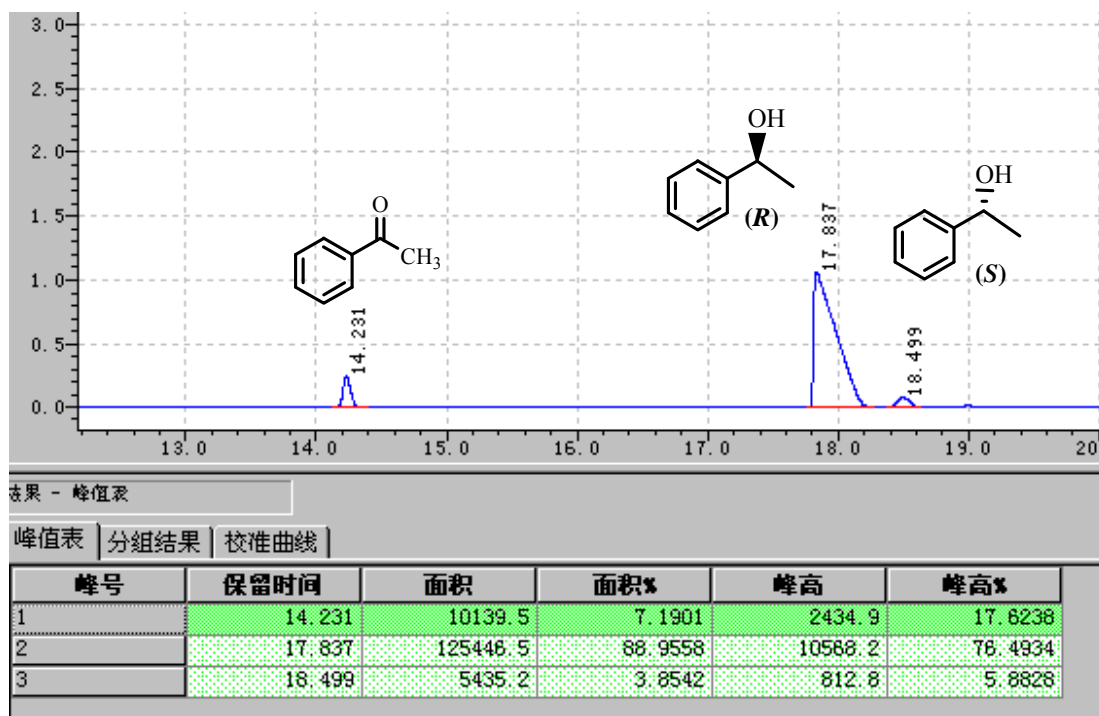

Asymmetric transfer hydrogenation of acetophenone using (*R,R*)-TsDPEN-modified POSS plus RhTsDPEN as a catalyst.

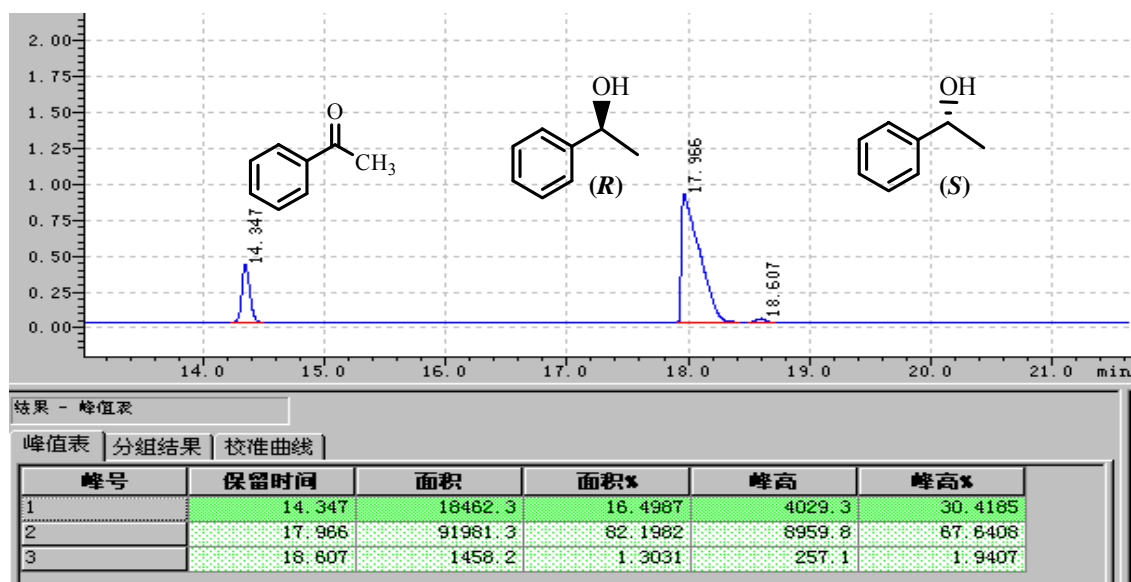



### Asymmetric transfer hydrogenation of 4-fluoroacetophenone.

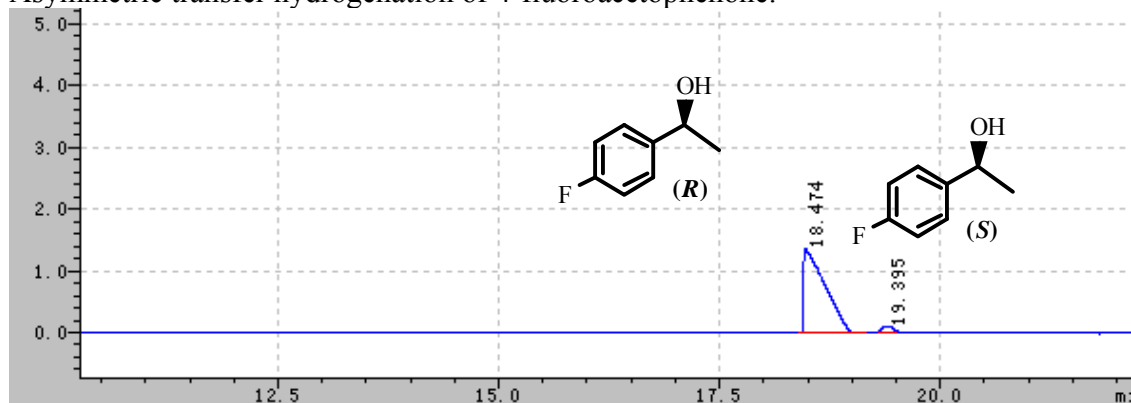

结果 - 峰值表

峰值表 | 分组结果 | 校准曲线

| 峰号 | 保留时间   | 面积       | 面积%     | 峰高      | 峰高%     |
|----|--------|----------|---------|---------|---------|
| 1  | 18.474 | 235619.9 | 96.2776 | 13827.2 | 92.9900 |
| 2  | 19.395 | 9109.7   | 3.7224  | 1042.4  | 7.0100  |

### Asymmetric transfer hydrogenation of 4-chloroacetophenone.

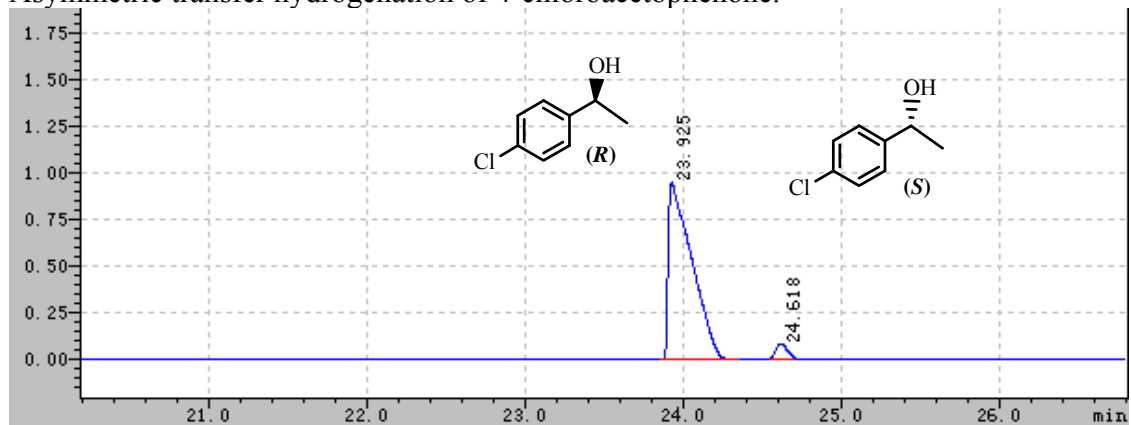

结果 - 峰值表

峰值表 | 分组结果 | 校准曲线

| 峰号 | 保留时间   | 面积      | 面积%     | 峰高     | 峰高%     |
|----|--------|---------|---------|--------|---------|
| 1  | 23.925 | 98830.7 | 96.0733 | 9519.0 | 92.1635 |
| 2  | 24.618 | 4039.4  | 3.9267  | 809.4  | 7.8365  |

Asymmetric transfer hydrogenation of 4-bromoacetophenone.

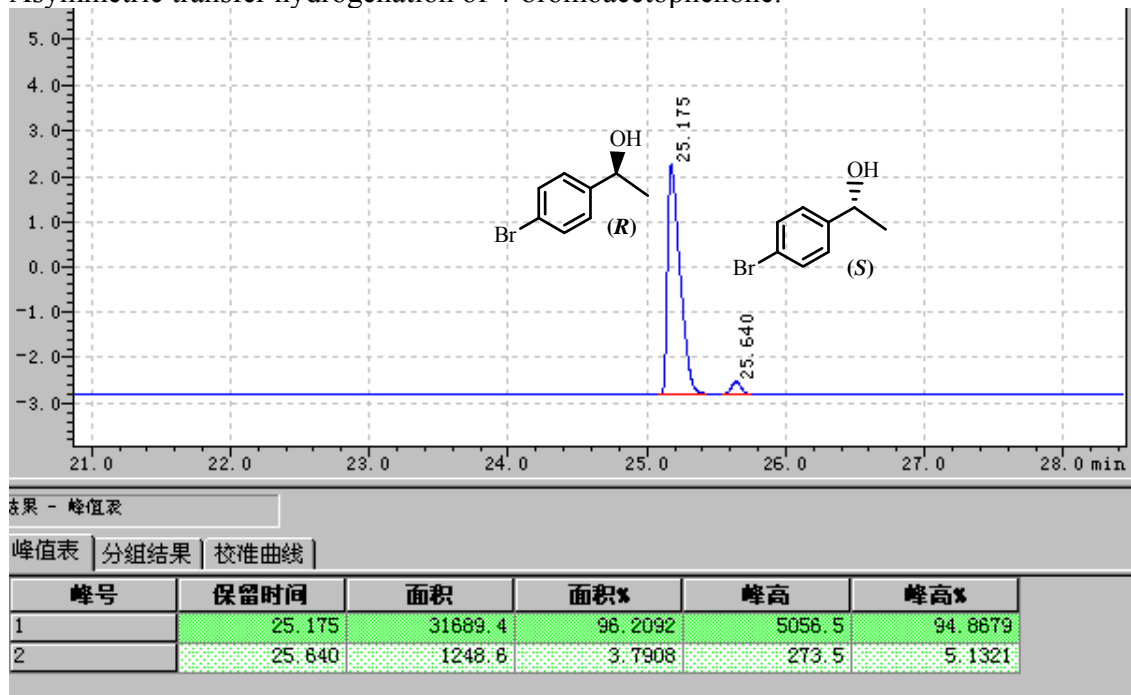

Asymmetric transfer hydrogenation of 3-bromoacetophenone.

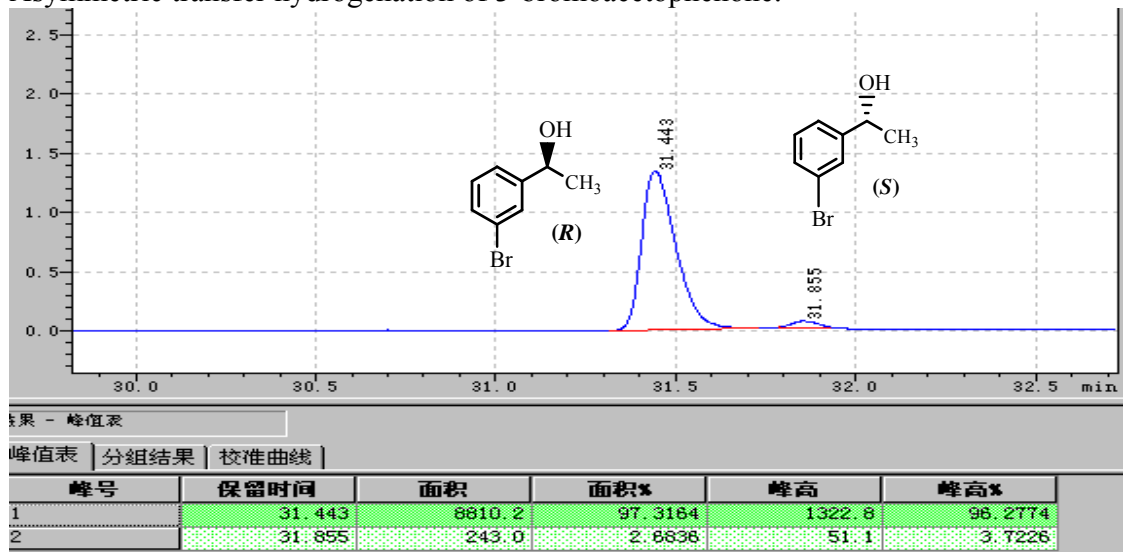

Asymmetric transfer hydrogenation of 4-methylacetophenone.

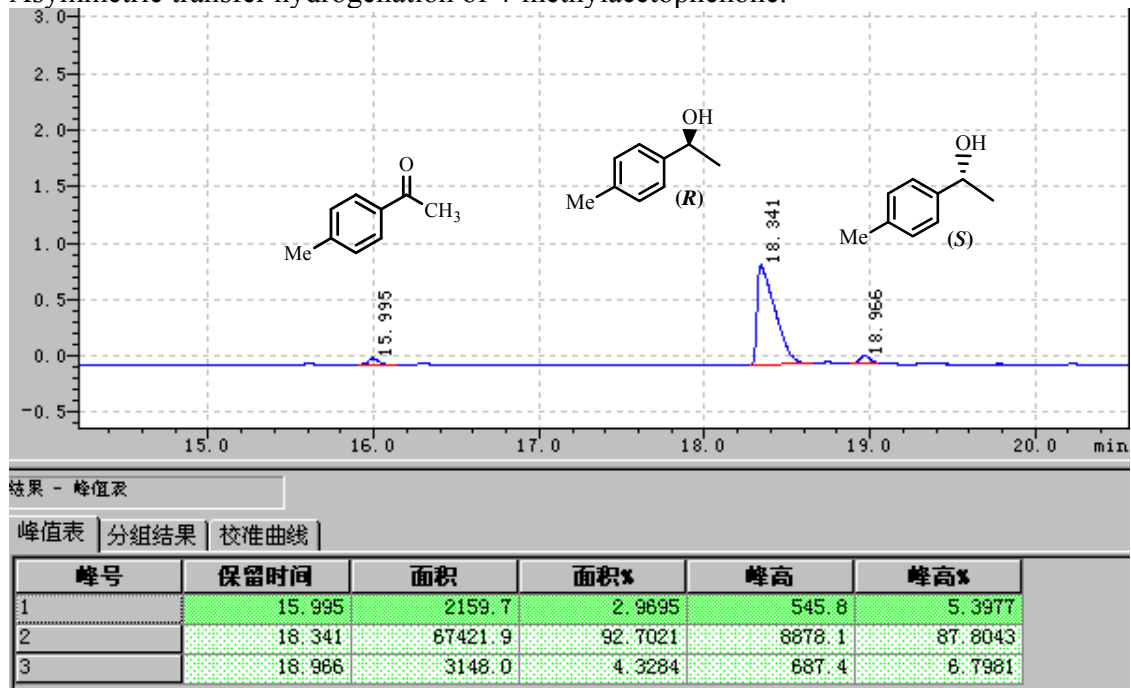

Asymmetric transfer hydrogenation of 4-methoxyacetophenone.

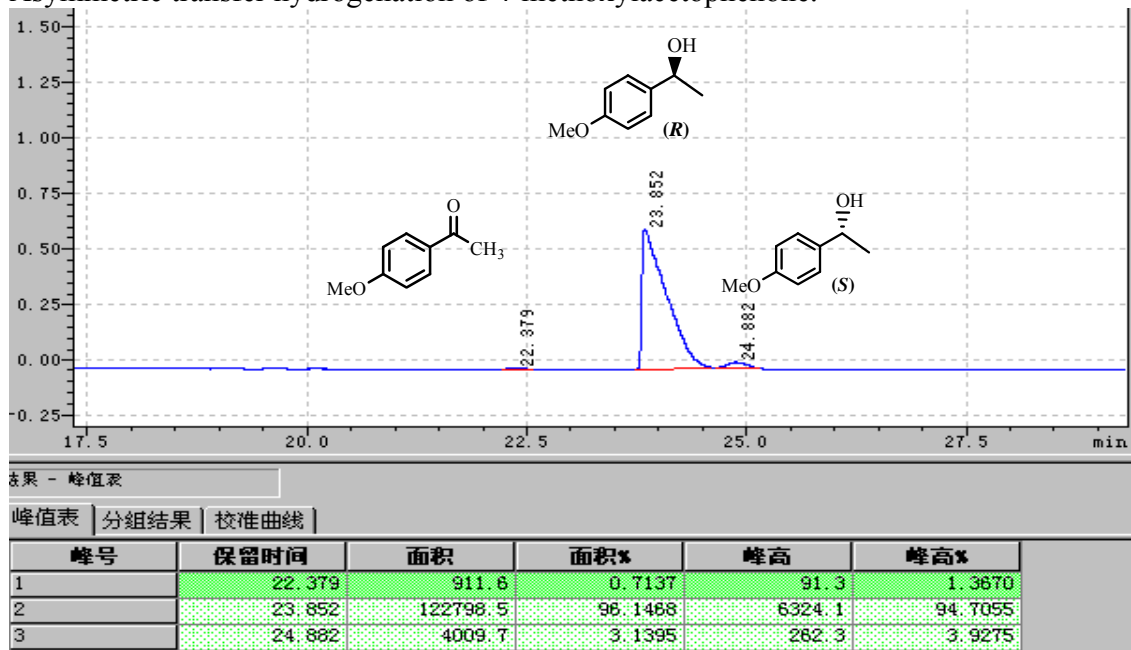

### Asymmetric transfer hydrogenation of 3-methoxyacetophenone.

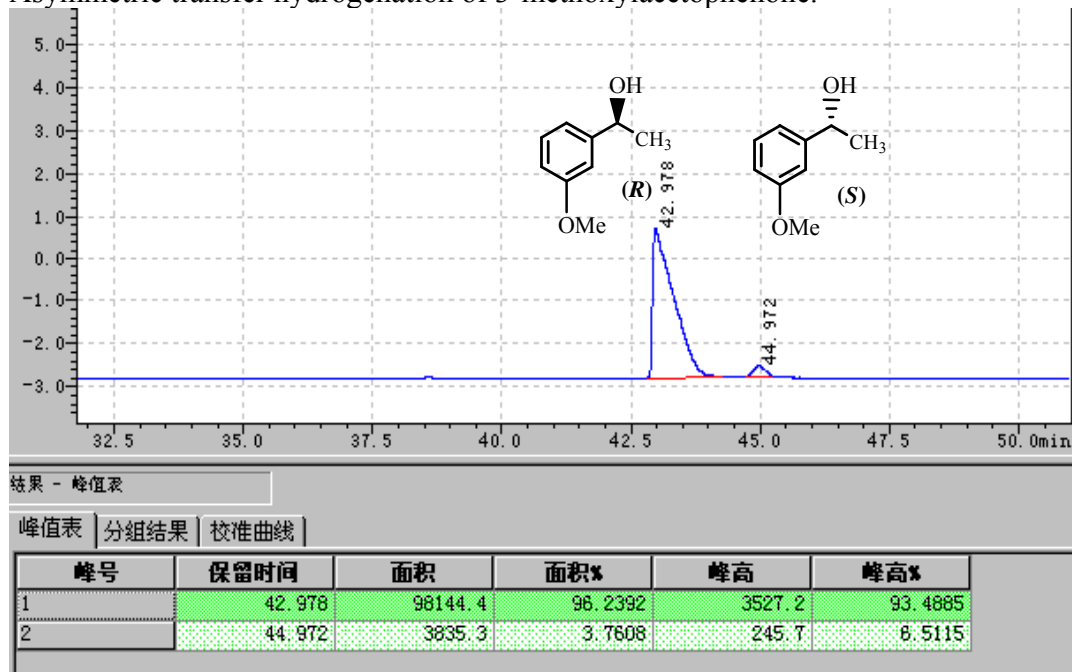

Asymmetric transfer hydrogenation of 2-acetonaphthone. (Daicel OJ-H chiralcel columns: 1.0 mL/min, hex/IPA=93:7.) ref: [Liu, P. N.; Gu, P. M.; Wang F.; Tu, Y. Q. Org. Lett., 2004, 6, 169.]

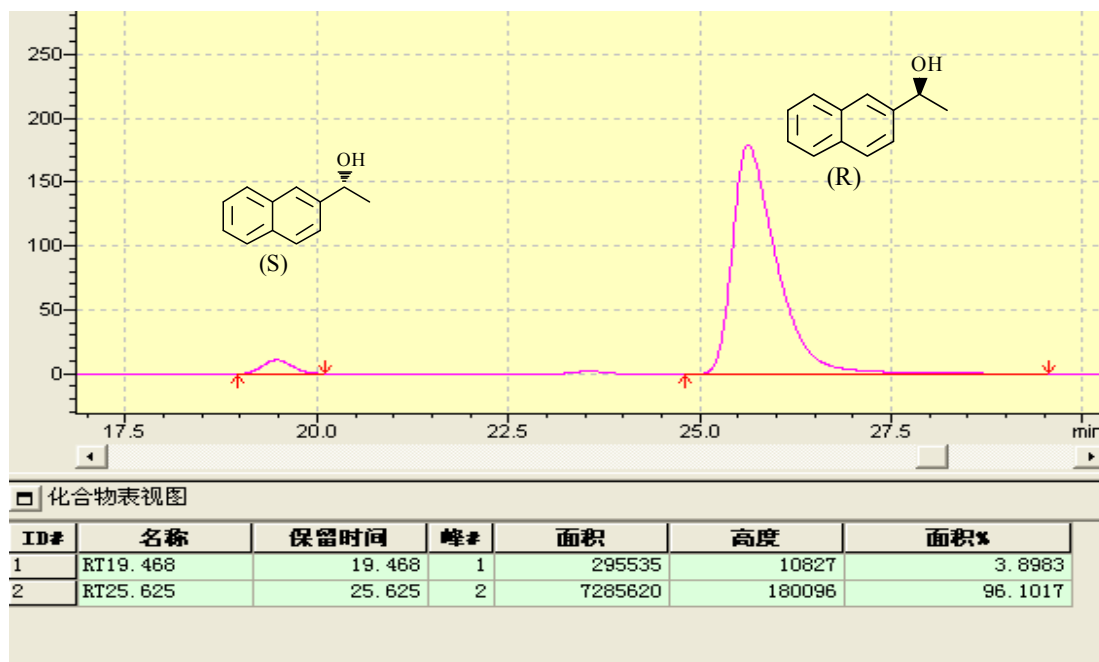

**Table S2.** Reusability of the catalyst **3** using acetophenone as a substrate.

| Recycle   | 1    | 2    | 3    | 4    | 5    | 6    | 7    | 8    | 9    | 10   | 11   | 12   |
|-----------|------|------|------|------|------|------|------|------|------|------|------|------|
| Conv. [%] | 99.3 | 99.9 | 99.5 | 97.5 | 99.9 | 99.9 | 99.3 | 99.9 | 99.9 | 98.7 | 97.7 | 96.2 |
| ee [%]    | 95.5 | 94.7 | 94.5 | 94.3 | 93.5 | 93.4 | 93.1 | 92.7 | 92.4 | 92.4 | 92.2 | 92.8 |

<sup>a</sup> Reaction conditions: catalysts (10.58 mg, 8.00  $\mu$ mol of Rh based on ICP analysis), HCO<sub>2</sub>Na (0.68 g, 10.0 mmol), ketone (2.0 mmol) and 2.0 mL water, reaction temperature (40 °C), reaction time (1.0 h).

<sup>b</sup> Determined by chiral GC or HPLC analysis (see ESI in Fig. S7).

**Figure S7.** Reusability in Asymmetric Transfer Hydrogenation of Acetophenone.

Recycle 2 of the catalyst **3** using acetophenone as a substrate.

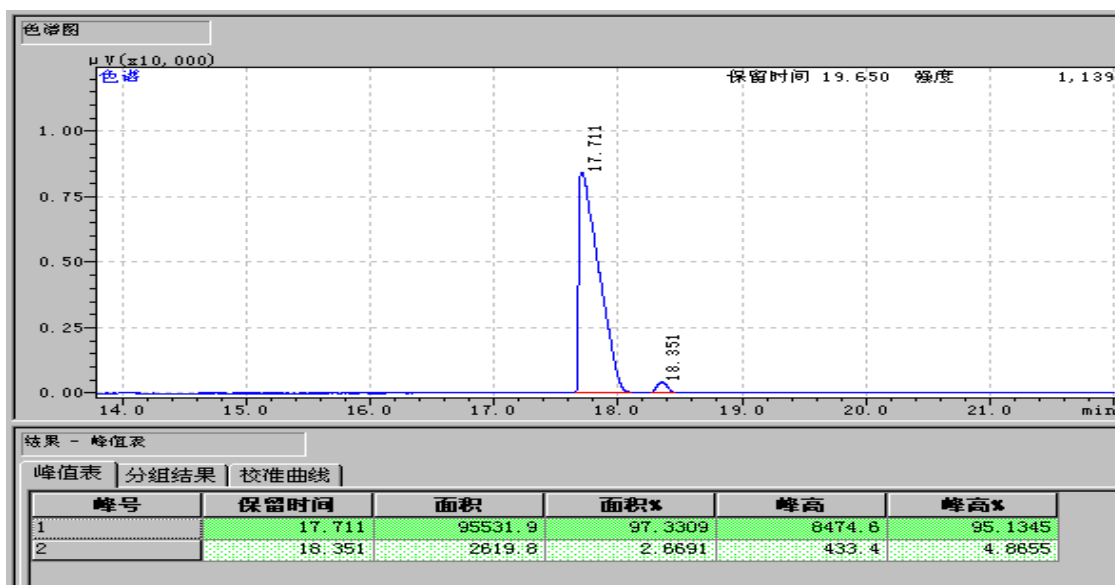

Recycle 3 of the catalyst of the catalyst **3** using acetophenone as a substrate.

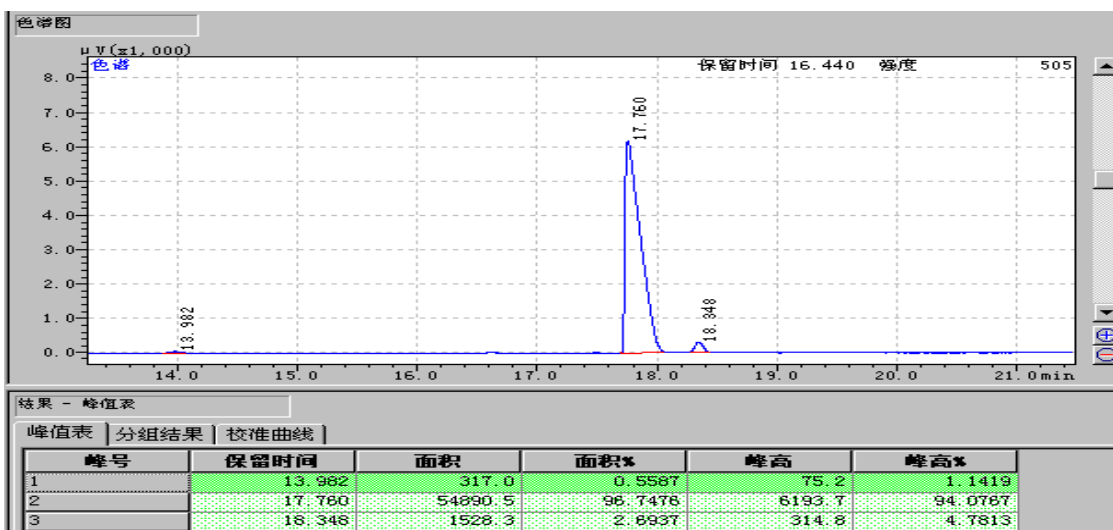

Recycle 4 of the catalyst **3** using acetophenone as a substrate.

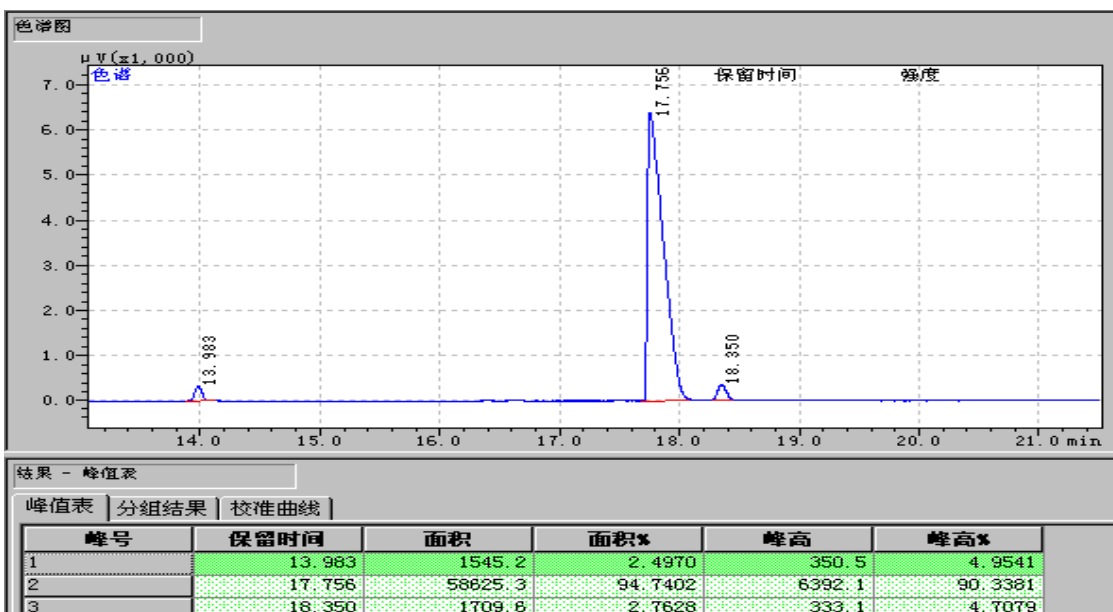

Recycle 5 of the catalyst **3** using acetophenone as a substrate.

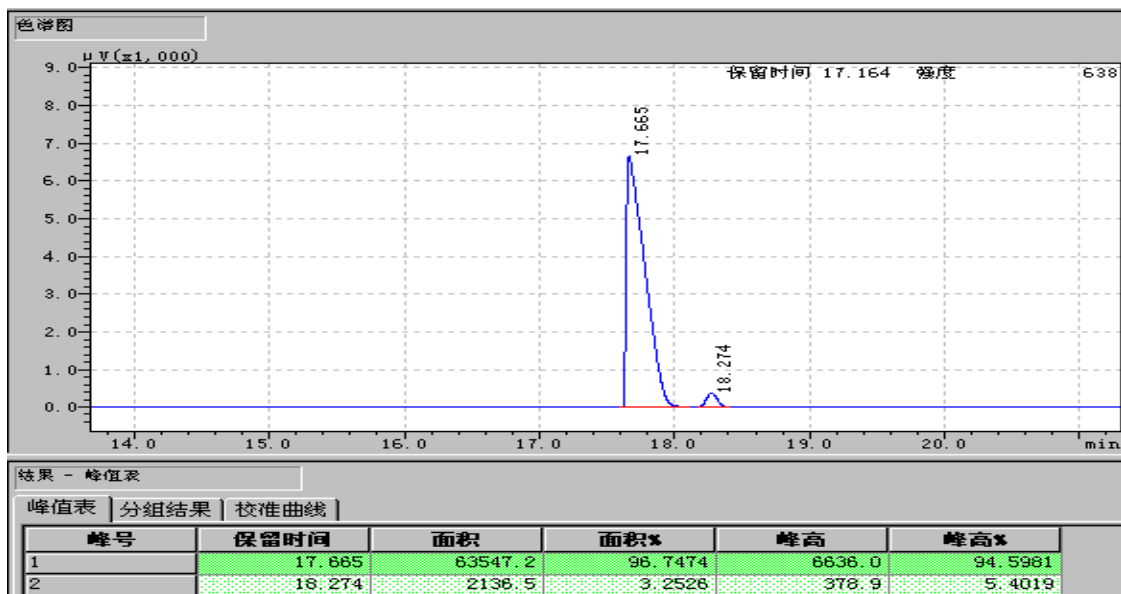

Recycle 6 of the catalyst **3** using acetophenone as a substrate.

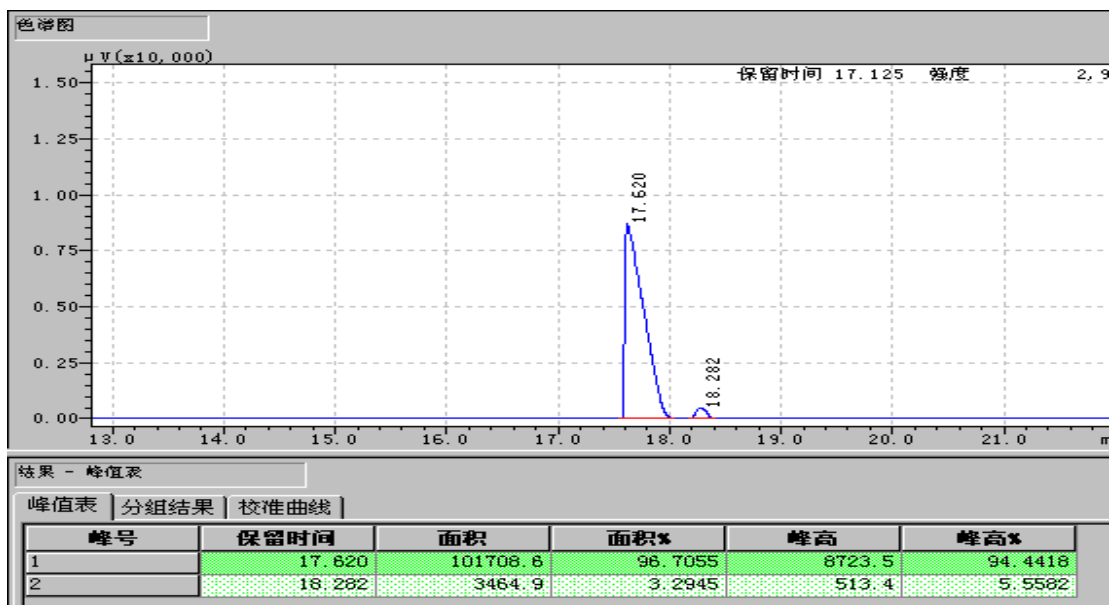

Recycle 7 of the catalyst **3** using acetophenone as a substrate.

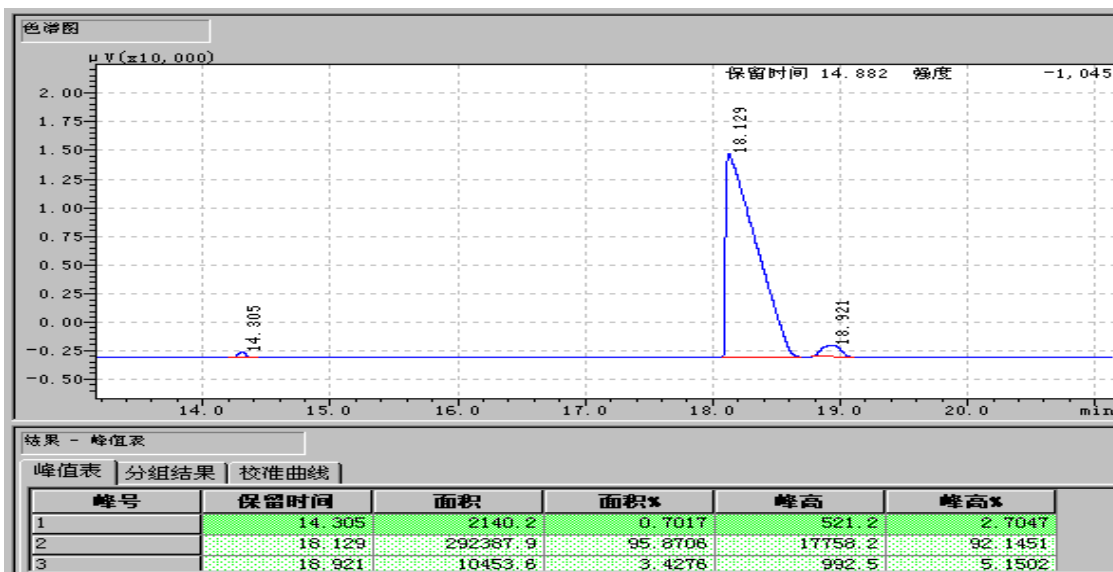

Recycle 8 of the catalyst **3** using acetophenone as a substrate.

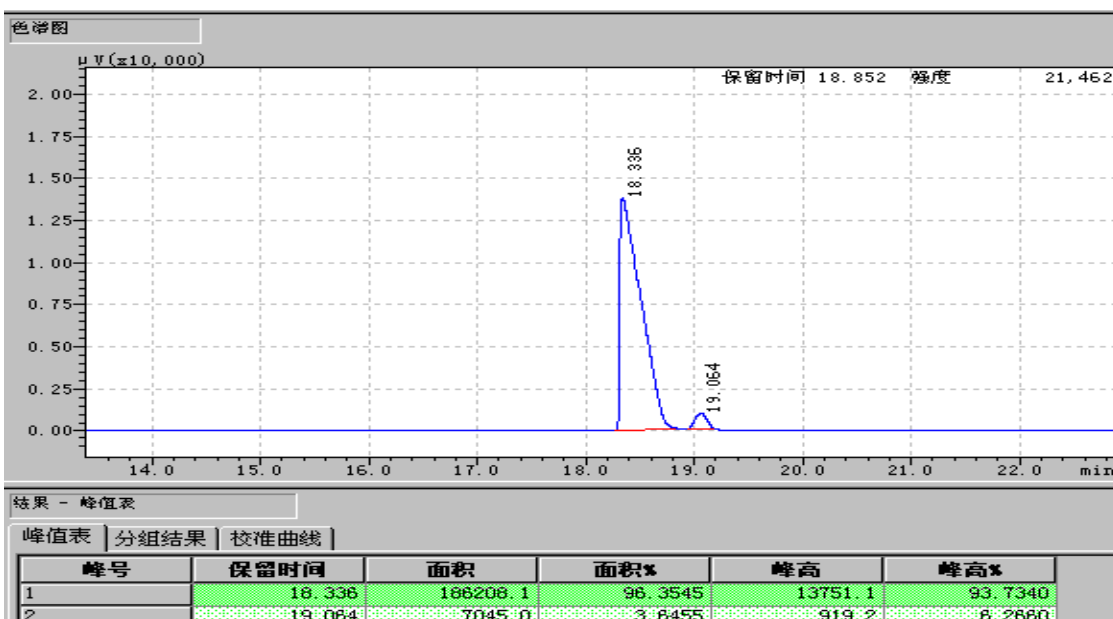



Recycle 9 of the catalyst **3** using acetophenone as a substrate.

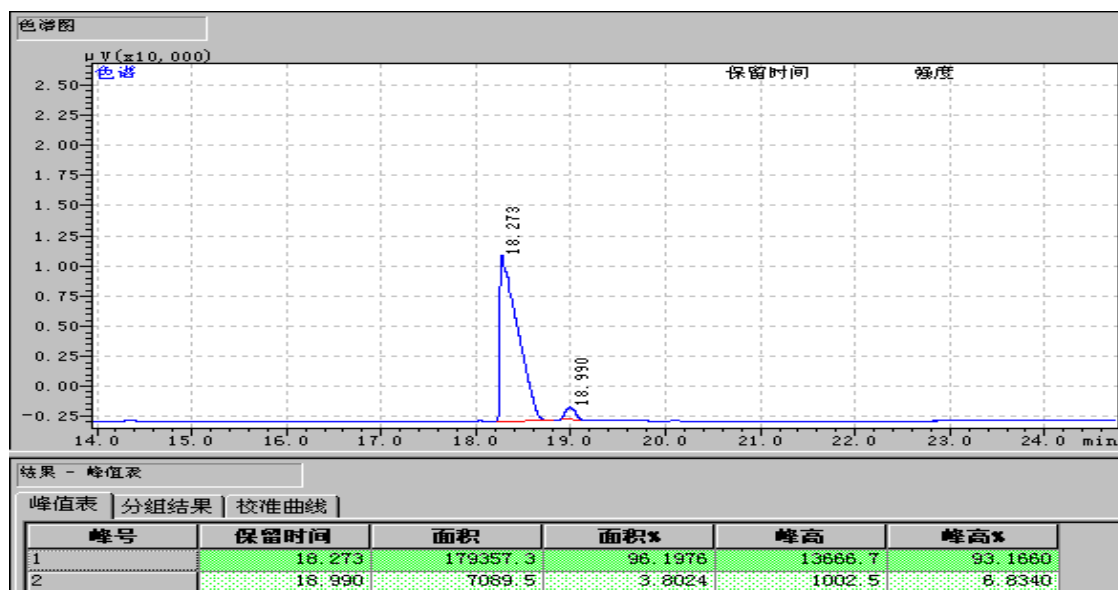

Recycle 10 of the catalyst **3** using acetophenone as a substrate.

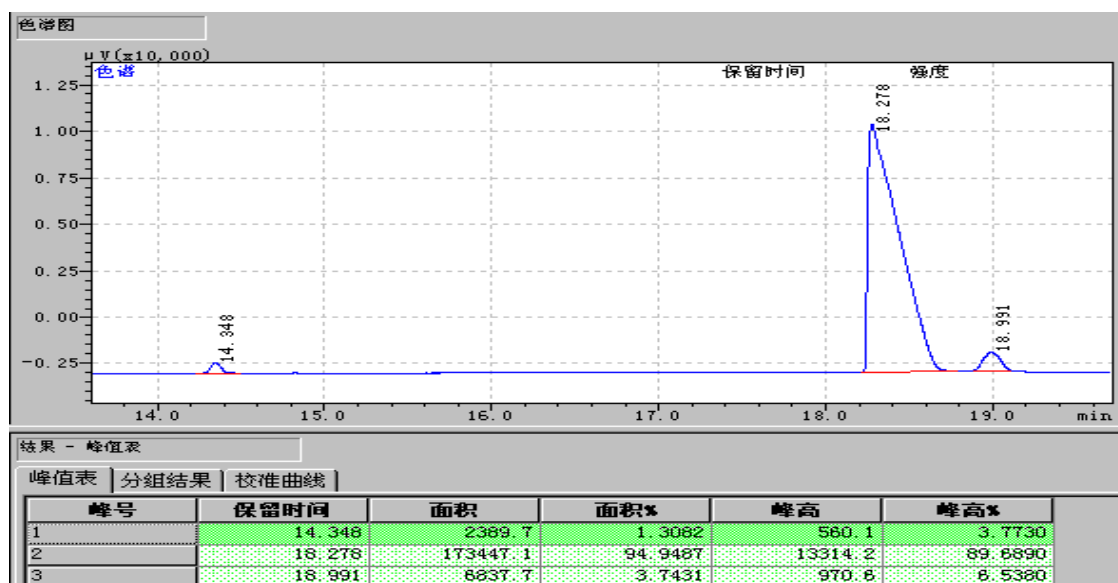

Recycle 11 of the catalyst **3** using acetophenone as a substrate.

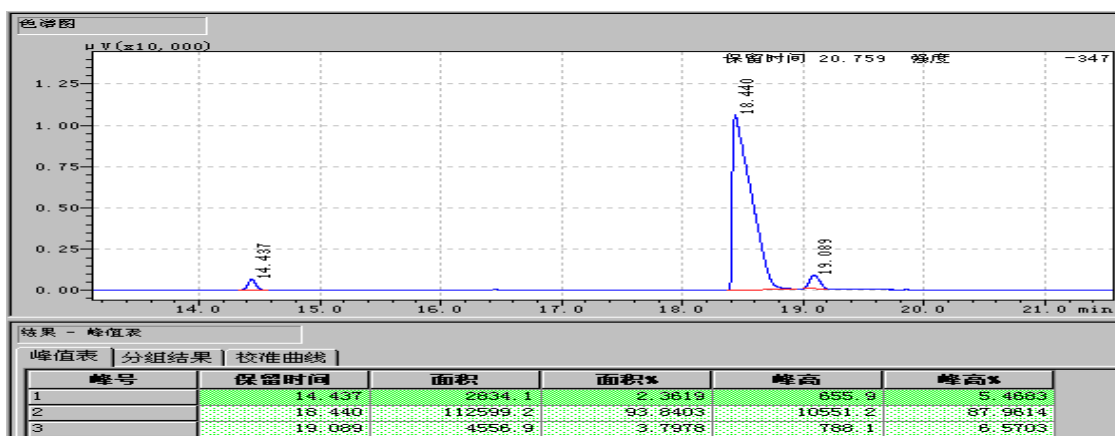

Recycle 12 of the catalyst **3** using acetophenone as a substrate.

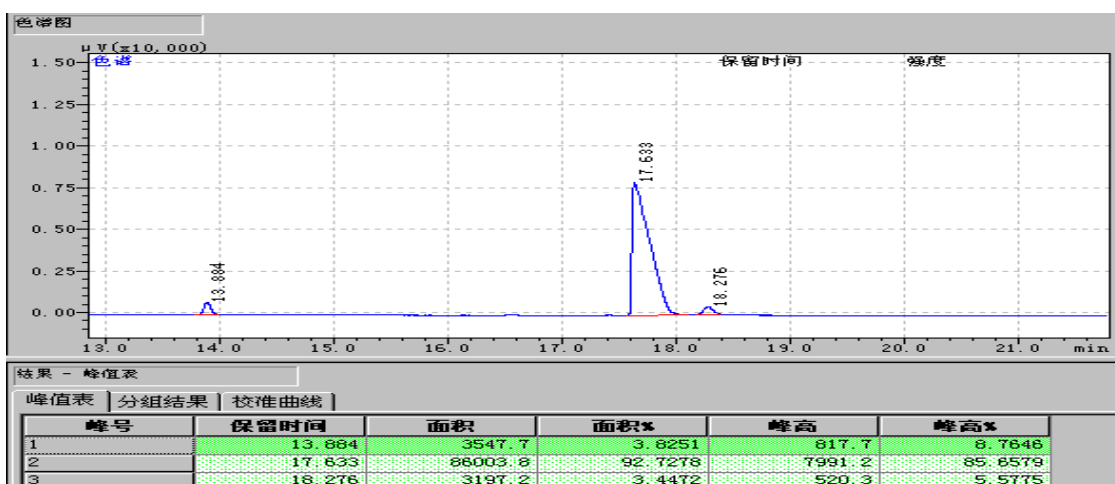

Recycle 13 of the catalyst **3** using acetophenone as a substrate. Conversion: 84.3% and ee: 92.9%.

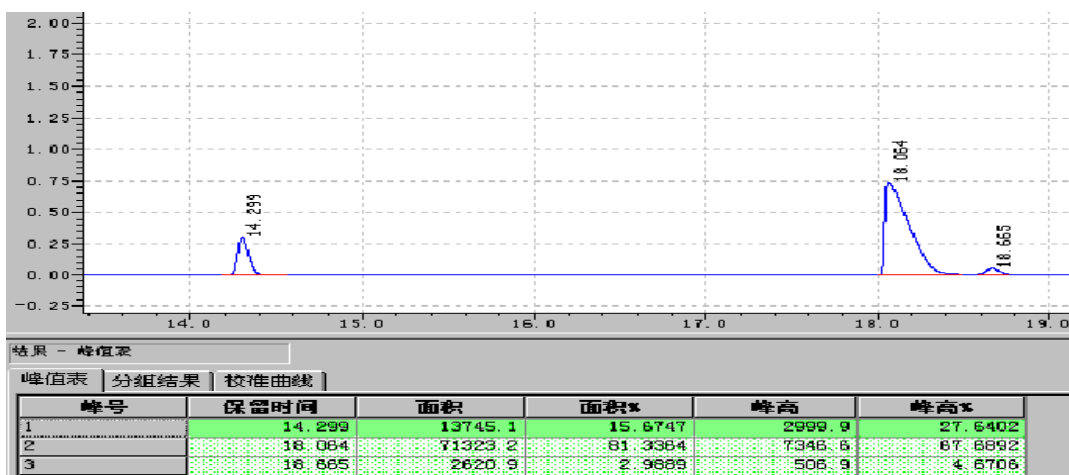

**Table S3.** Asymmetric transfer hydrogenation of ketones and analogues.<sup>a</sup>

| Entry | Substrate                                                                         | Product                                                                           | Conv. (%) <sup>b</sup> | Ee.(%) <sup>b</sup> |
|-------|-----------------------------------------------------------------------------------|-----------------------------------------------------------------------------------|------------------------|---------------------|
| 1     |  |  | >99                    | 92                  |
| 2     |  |  | 99                     | 94                  |
| 3     |  |  | >99                    | 99                  |
| 4     |  |  | 99                     | 92                  |
| 5     |  |  | >99                    | 97                  |

<sup>a</sup> Reaction conditions: catalysts (10.58 mg, 8.00  $\mu$ mol of Rh based on ICP analysis),  $\text{HCO}_2\text{Na}$  (0.68 g, 10.0 mmol), ketone (2.0 mmol) and 2.0 mL water, reaction temperature (40  $^\circ\text{C}$ ), reaction time (1.0 h).

<sup>b</sup> Determined by chiral HPLC analysis (see ESI in Fig. S8).

**Figure S8.** Asymmetric transfer hydrogenation of ketones and analogues.

Asymmetric transfer hydrogenation of propiophenone.

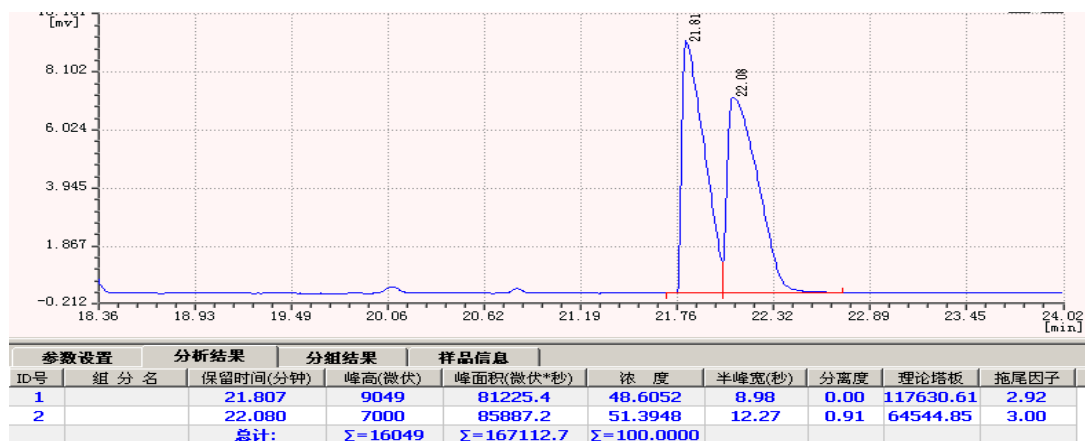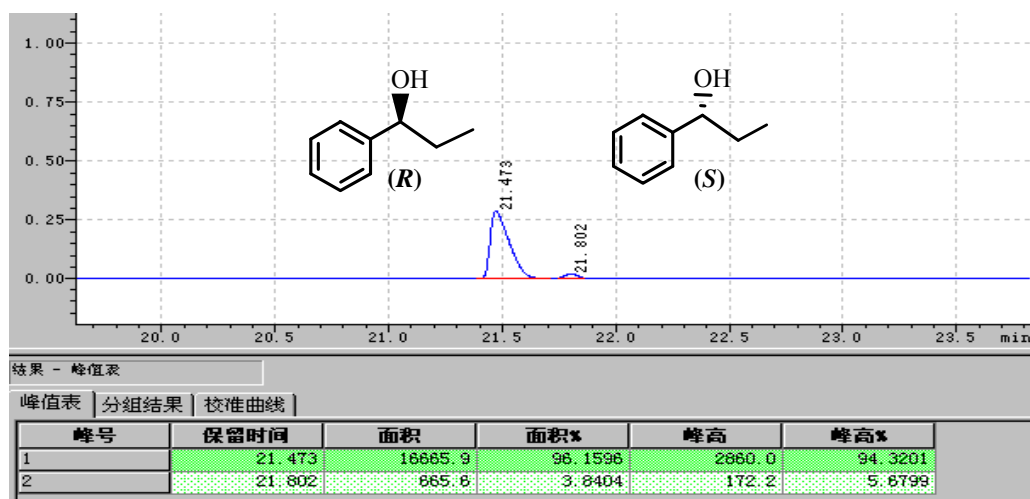

Asymmetric transfer hydrogenation of 2-Phenylacetophenone (Daicel OD-H chiralcel columns: 1.0 mL/min, hex/IPA = 98:2) (ref: *Chem. Eur. J.*, 2008, **14**, 2209)

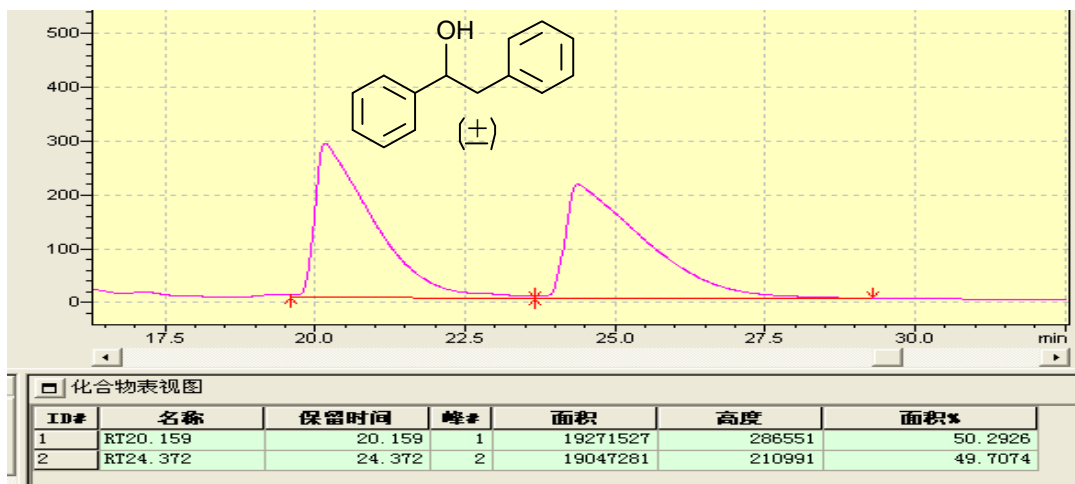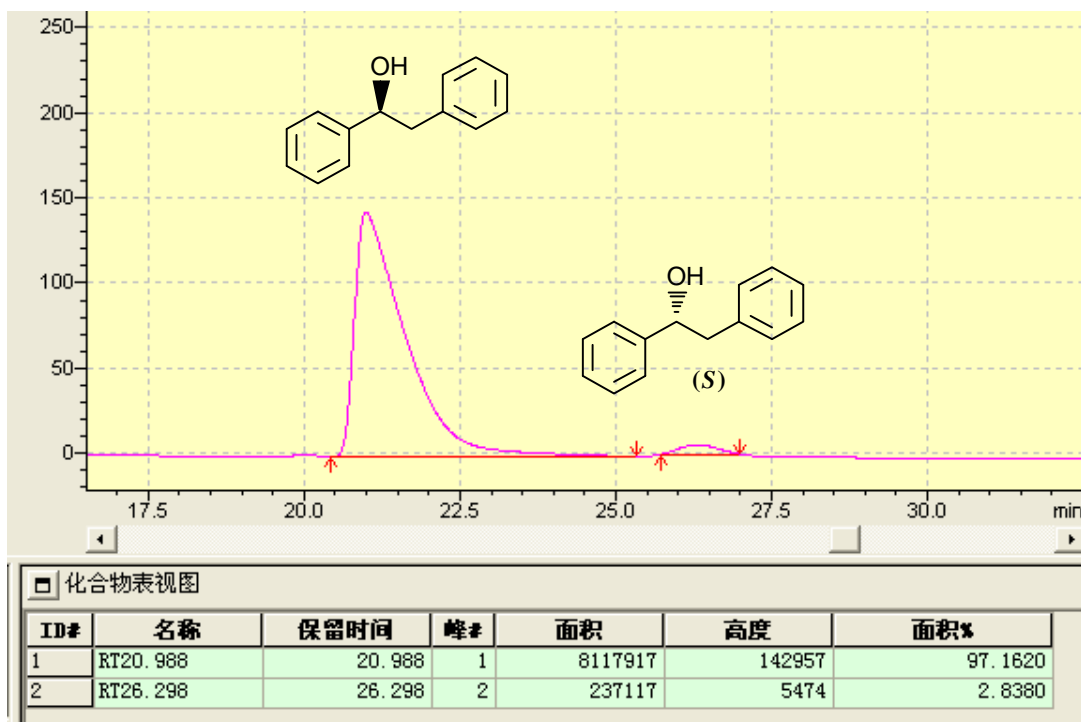

Asymmetric transfer hydrogenation of Benzil (Daicel OJ-H chiralcel columns: 0.5 mL/min, hex/IPA = 90:10. d.r = 1.6 : 1) (ref: *J. Am. Chem. Soc.*, 2011, **133**, 14960)

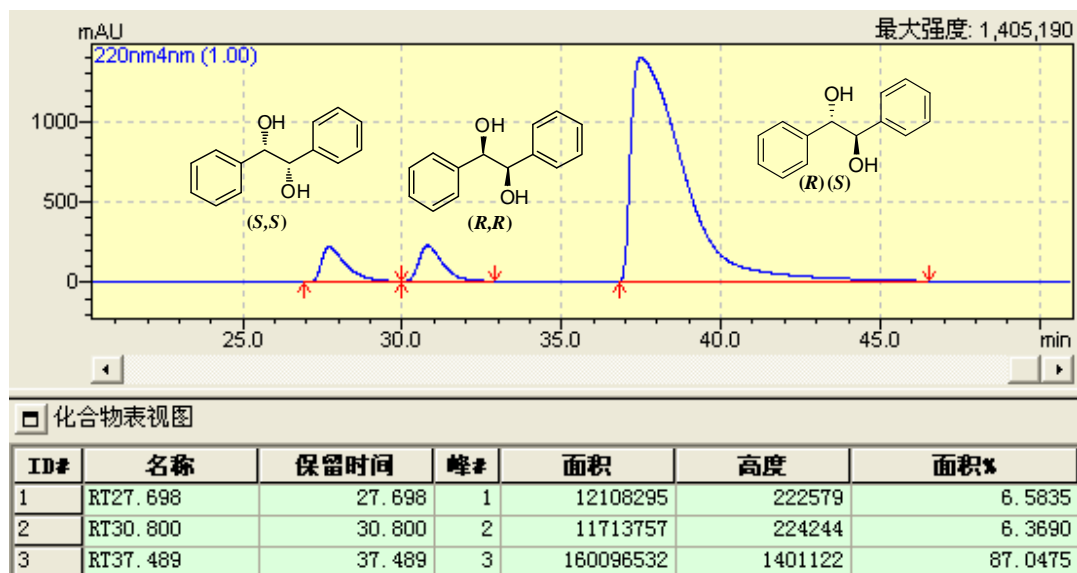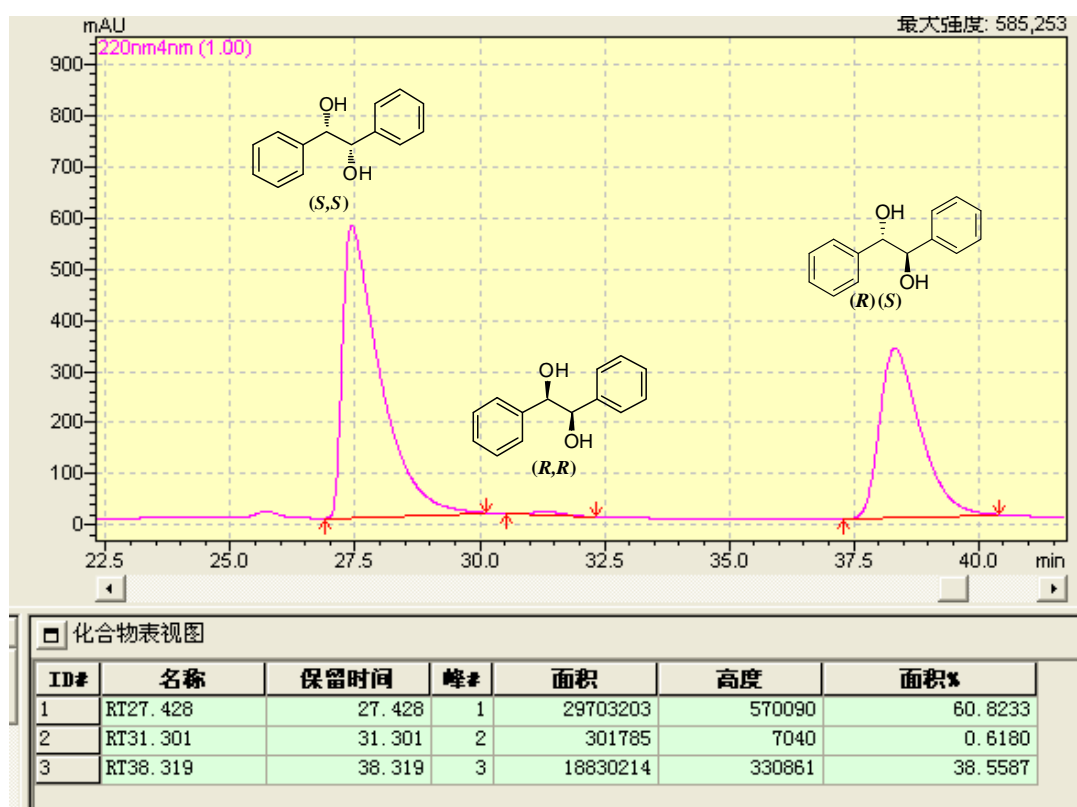

Asymmetric transfer hydrogenation of E-Chalcone.(Daicel OD-H chiralcel columns: 1 mL/min, hex/IPA=96:4) (ref: *Chem. Eur. J.*, 2008, **14**, 2209)

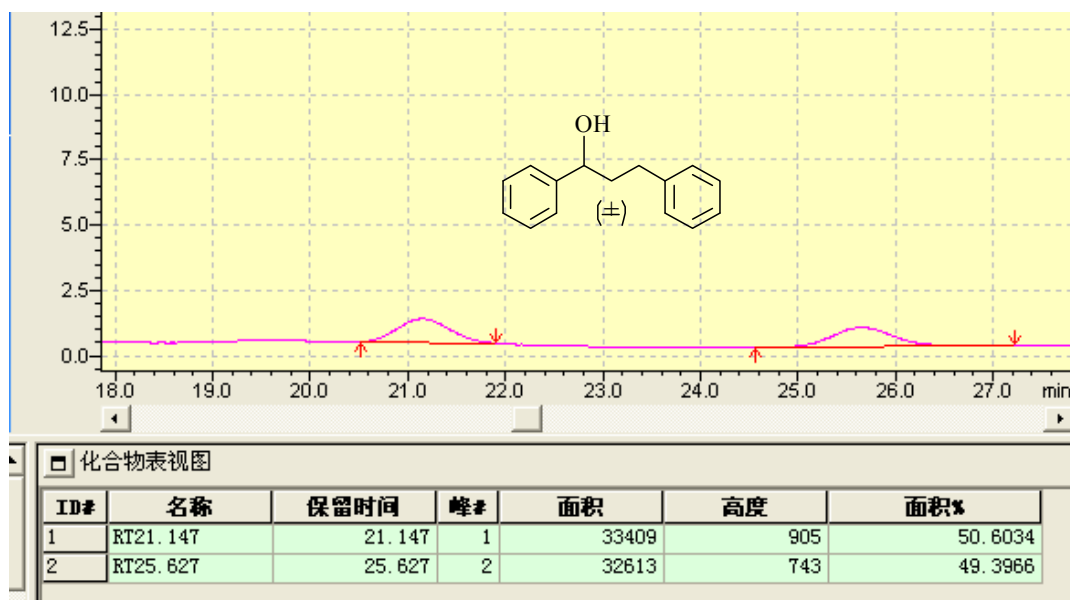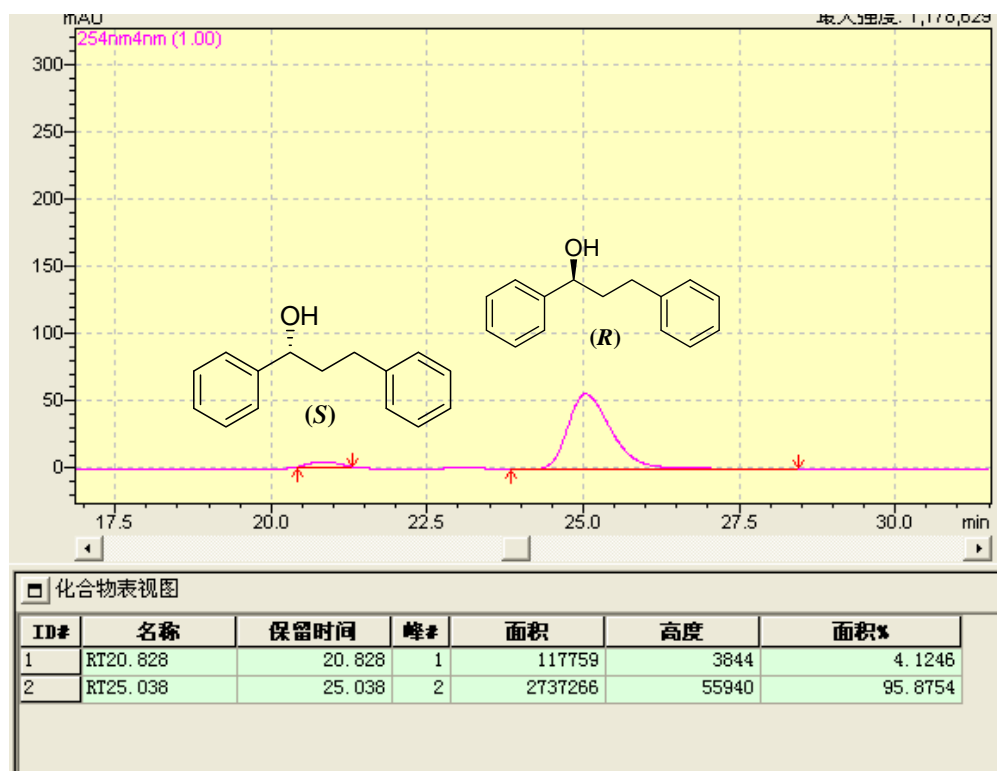

Asymmetric transfer hydrogenation of Ethyl Benzoylacetate. (Daicel OB-H chiralcel columns: 0.5 mL/min, hex/IPA=90:10) (ref: *J. Org. Chem.* **2001**, *66*, 8682)

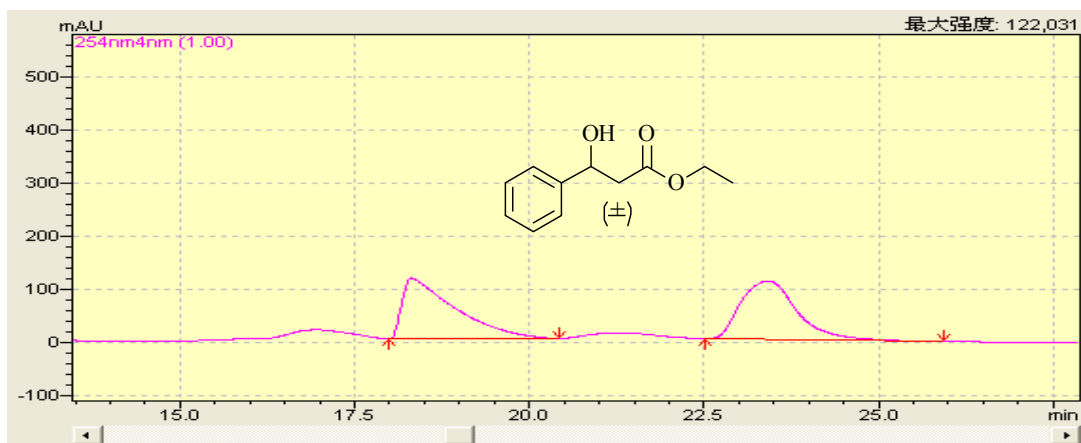

化合物表视图

| ID# | 名称       | 保留时间   | 峰# | 面积      | 高度     | 面积%     |
|-----|----------|--------|----|---------|--------|---------|
| 1   | RT18.315 | 18.315 | 1  | 5963279 | 114398 | 49.2919 |
| 2   | RT23.407 | 23.407 | 2  | 6134599 | 109759 | 50.7081 |

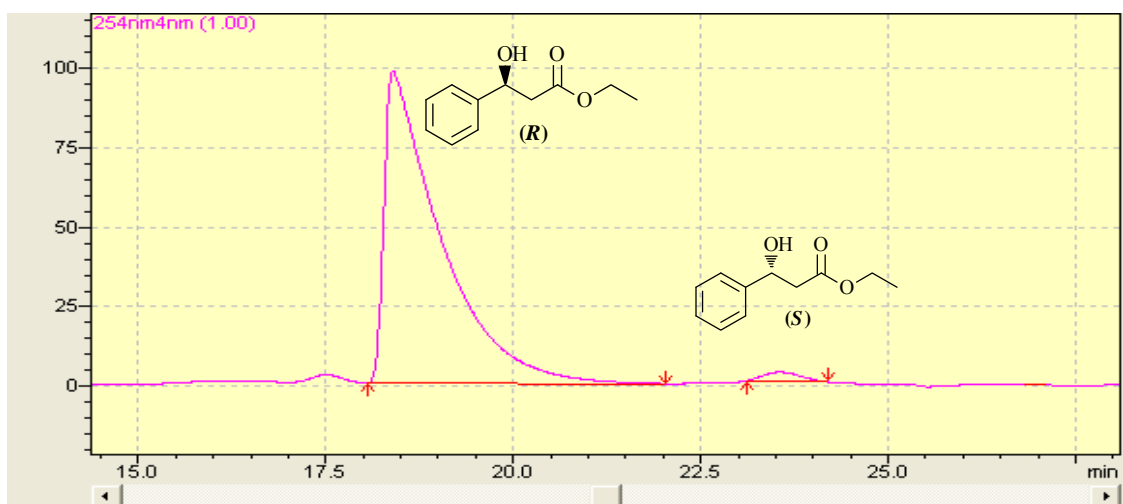

化合物表视图

| ID# | 名称       | 保留时间   | 峰# | 面积      | 高度    | 面积%     |
|-----|----------|--------|----|---------|-------|---------|
| 1   | RT18.391 | 18.391 | 1  | 5113720 | 98014 | 97.6488 |
| 2   | RT23.555 | 23.555 | 2  | 95941   | 2789  | 1.8320  |



**Figure S9.** The SEM (a) and TEM (b) images of the catalyst **3**.

(a)

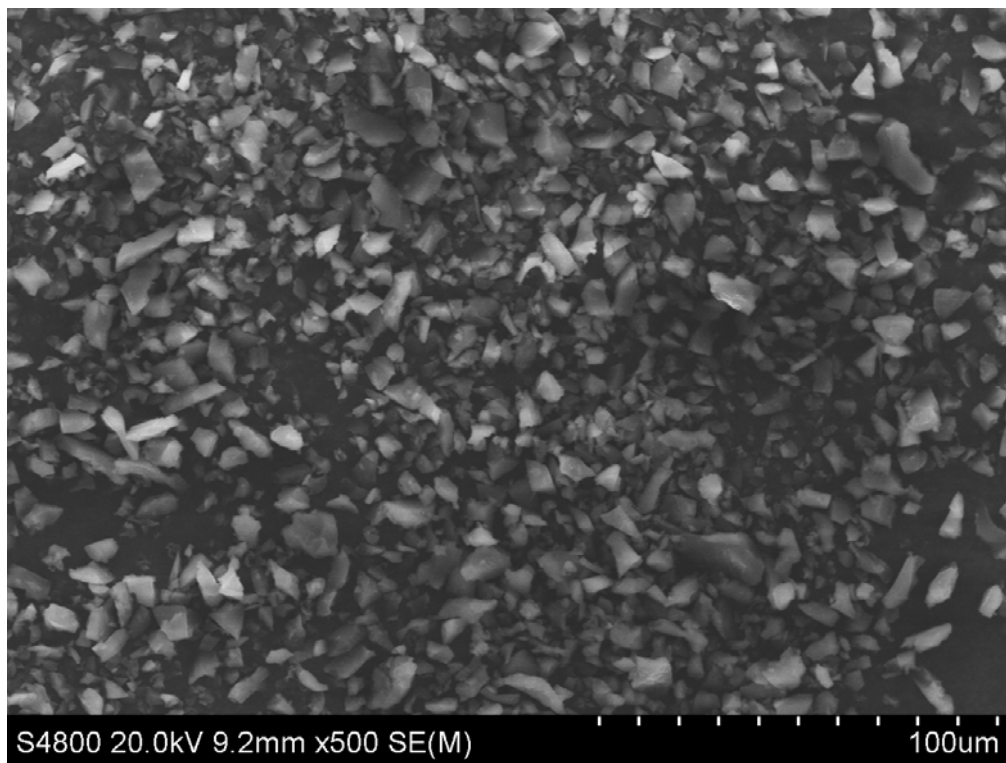

(b)

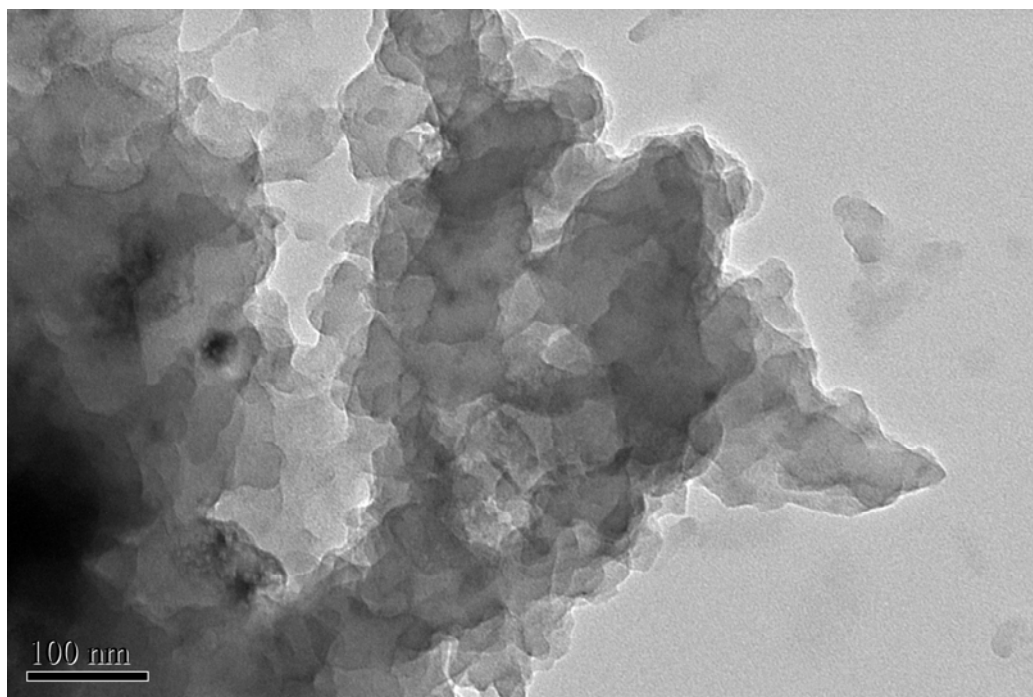

**Figure S10.** Asymmetric transfer hydrogenation using 10.0 mmol of acetophenone as a substrate.

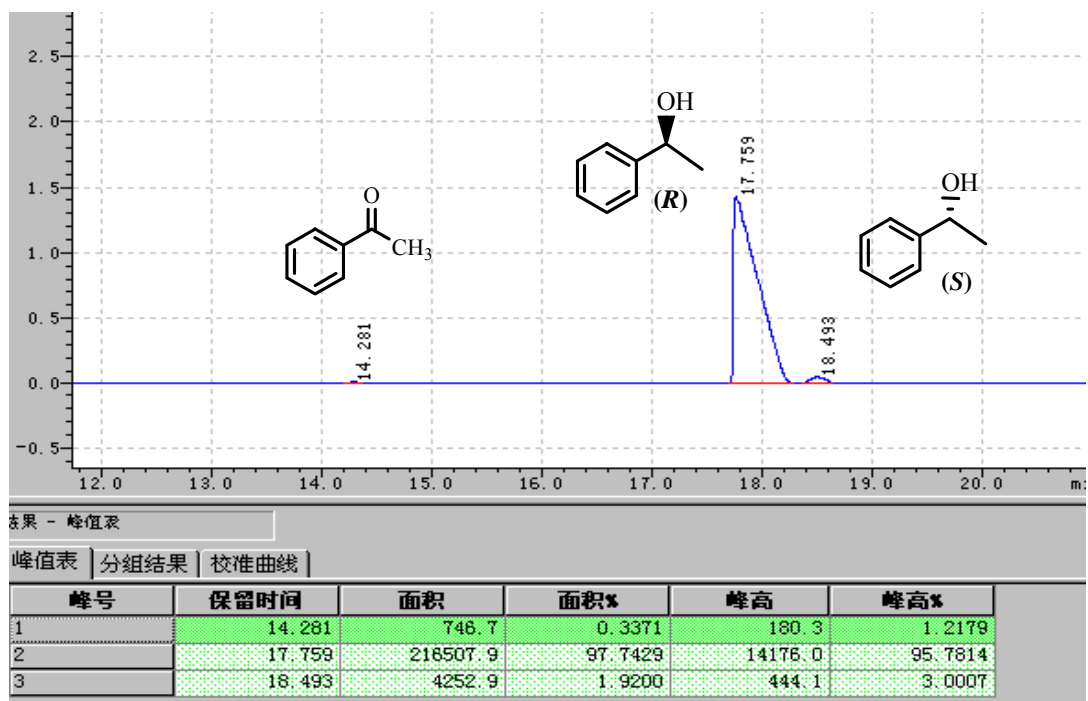

Supplement: c2cc31927f.pdf [file c2cc31927f.pdf]
